# Supplementary material
Source: PubMed Central journal article supplement (PMC7502755)

**Supergene evolution via step-wise duplications and neofunctionalization of a floral-organ identity gene**

Cuong Nguyen Huu<sup>1</sup>, Barbara Keller<sup>2</sup>, Elena Conti<sup>2</sup>, Christian Kappel<sup>1</sup>, Michael Lenhard<sup>1,\*</sup>

**Dataset S1**

## Coding sequences of genes used for phylogenetic analysis in Figures 4d,e

>P.forbesii\_GLO1

```
ATGGGGAGAGGAAAGATAGAGATAAAGAGAATTGAAAACCTCAAATAATAGGCAGGTGACTTATTCAAAGAG
GAGAAATGGGATTATAAAAAAAGCAAAGAGATCGCAGTTTTGTGTGATGCTCAGGTTTCTCTTGTATTTT
TTGCTAGCTCTGGTAAGATGCATGAATATTGCAGCCCTAAATCTCCGTTGATTAACATCTTGGATGCATAT
CAGAAGCAATCTGGGAATAGGTTGTGGGATGCTAAGCATGAGAACCTCAGCAATGAAATGAAAGGATCAA
GAAAGAGAATGATAATATGCAAAATGAGCTCAGGCACCTTGAAAGGAGAAGATATACAATCTTTGCACCATA
AGGAGCTTATGTCATTAGAAGGTGCCCTCGAAAATGGACTCACTTGTGTTTCGCGATAGACAGATGGAGATT
TACAGGATGGCGAAAGAAAATTTTGTGACAAGGAAAGGATTCTGGAAGATGAGAAATAGAAGCCTTAGTTA
TCAAATGCACCACCAAGTGATGGATATAGAAGCGGGGAGATGGAAAATGATTATCAATACCAGCCTCAA
TGCCTTTCTCATTCCGTGTGCAACCAATTCAGCCAAATTTACATGAGAGATTTTAA
```

>P.forbesii\_GLO2

```
ATGGGAAGAGGAAAGGTAGAGATAAAGAGGATTGAGAACTCTAATATTAGGCAGGTGACTTATTCAAATAG
GAGAAATGGAATAATCAAAAAGGCTAAGGAGATATCAGTTTTGTGTGATGCTCAGGTTTCTCTTCTAATTT
TCGCTAGCTCTGGTAAGATGCATGACTACTGCAGTCCTAATTCCTCGTTAATTAATATCTTGGATGCATAC
CAGAAGCAATCTGGGACTAGGTTGTGGGAGGCTAAGCATGAGAACCTTAGCAATGAAATGAGAGGATAAA
GAAAGAAAATGACAACATGCAAAATGAGCTCAGATACTTGAAAGGAGAAGATATACAATCTTTGCACCACA
AGGAGCTCATGTCTATAGAGAACGCACCTGAAAATGGAGTTACCCGTGTCCGCCAGAGACAAATGGAGATC
TACATGATGGCCAAAAAAAATTTTCGCTGAAAAGAGAGGATTCTAGAAGATGAGAACAACCGCCTTAATTG
CAAAATTCAGAAGCGATGGATATGCAGATGCCTTGCTCCTACCGTGTACAACCAATTCAGCCAAATTTAC
ATGATCGCTTTTAA
```

>P.veris\_GLO1

```
ATGGGTAGAGGAAAGATAGAGATAAAGAGGATTGAGAACTCAAATAATAGGCAAGTTACTTATTCAAAGAG
GAGAAATGGGATCATAAAAAAGCAAAGGAGATCTCAGTTTTATGTGATGCTCAGGTTCTCCCTTGTATTTT
TTGCTAACTCTGGTAAAATGCATGAATATTGCAGCCCTAAACTCCGTTGATTAACATCTTGGATGCATAC
CAGAAGCAATCTGGGAACAGGTTGTGGGATGCTAAGCATGAGAACCTCAGCAACGAAATAGAAAGGATCAA
GAAAGAGAATGACAATATGCAAAATGAGCTCAGGCACCTTGAAAGGAGAAGATGTACAATCTTTGCACCACA
AGGAGCTTATGTCCATTGAATCCGCCCTCGAAAATGGACTTGCTTGTGTTTCGCCAGAGAGAGATGGAGATT
TACAGGATGGCAAGAGAAAATTTTGTGACAAGGAAAGGGTACTGGAAGATGAAAACAGGAGCCTTACTTA
CCAAATGCACCACCTGGTGATGGATATAGAAGCGGGGAGATGGAAAATGGATATAAATACCAGTCTCAA
TGCCATTTTCTTCCGGGTGCAACCGATTTCAGCCAAATTTACAGGAGAGAATTTAA
```

>P.veris\_GLO2

```
ATGGGGAGAGGAAAGGTAGAGATAAAGAGGATTGAAAACCTCGAATATCAGACAAGTGACGTATTCAAACAG
GAGAAATGGGATACTGAAAAAGCCAAGGAGATCTCGGTTTGTGTGATGCTCAGGTTCTCCCTTATTATTTT
TTGCTAGCTCCGGTAAGATGCATGATTACTGCAGTCCAAATCTTTCGTTAATTAACATCTTGGATGCATAT
CAGAAGCAATCTGGGATTAGGTTGTGGGATGCTAGACATGAGAACCTTAGCAATGAAATGAGAGGGTCAA
AAAAGAGAATGACAATATGCAGATTGAGCTCAGATACTTGAAAGGAGAAGATATACAATCTTTGCACCACA
AGGAGCTCATGTCTATAGAGGATGCACCTCGAAAATGGACTAACTCGTGTTCGCGAGAGACAGATGGAGATC
TACAGAATGGCAAAAGACAATTTTCGCTGATAAAGAAAGGCTTCTAGAAGATGAGAACAAGCGCCTTGGCTA
CAAATTTTCAGCAAGTGATGGATATGCAGATGCCTTGCTCCTACCGTGTACAGCCGCTTCAACCAATTTAC
ACGATCAGTTTTTAA
```

>P.oreodoxa\_GLO1

```
ATGGGGAGAGGAAAGATAGAGATAAAGAGGATTGAAAACCTCAAATAATAGGCAGGTGACTTATTCAAAGAG
GAGAAATGGAATAATAAAAAAGCAAAGAGATCGCAGTTTTGTGTGATGCTCAGGTTTCTCTTGTATTTT
TTGCTAGCTCTGGTAAGATGCATGAATATTGCAGCCCTAAATCTCCGTTGATTAACATCTTGGATGCATAT
CAGAAGCAATCTGGGAATAGGTTGTGGGATGCTAAACACGAGAACCTCAGCAATGAAATCGAAAGGATCAA
GAAAGAGAATGATAATATGCAAAATGAGCTCAGGCACCTTGAAAGGAGAAGATATACAATCTTTGCACCACA
AGGAGCTTATGTCATTAGAAGGTGCCCTCGAAAATGGACTCACTTGTGTTTCGCGATAGACAGATGGAGATT
TACAGGATGGCGAAAGAAAATTTTGTGACAAGGAAAGGATTCTGGAAGATGAGAAATAGAAGCCTTAGTTA
TCAAATGCACCACCAAGTGATGGATATAGAAGGTGGGGAGATGGAAAATGATTATCAATACCAGCCTCAA
TGCCTTTCTCGTTCGGTGTGCAACCAATTCAGCCAAATTTACATGAGAGATTTTAA
```

>P.oreodoxa\_GLO2

```
ATGGGAAGAGGAAAGGTAGAGATAAAGAGGATTGAGAACTCTAATATTAGGCAGGTGACTTATTCAAATAG
GAGAAATGGAATAATCAAAAAGGCTAAGGAGATATCAGTTTTGTGTGATGCTCAGGTTTCTCTTCTTATTTT
TCGCTAGCTCTGGTAAGATGCATGACTACTGCAGTCCTAATTCCTCGTTAATAAATATCTTGGATGCATAC
CAGAAGCAATCTGGGACTAGGTTGTGGGAGGCTAAGCATGAGAACCTTAGCAATGAAATGAGAGGATAAA
GAAAGAAAATGACAACATGCAAAATGAGCTCAGATACTTGAAAGGAGAAGATATACAAGCTTTGCACCACA
```

AGGAGCTCATGTCTATGGAGAACGCACTTGAAAATGGAGTTACCCGTGTCCGCCAGAGACAAATGGAGATC  
TACATGATGGCAAAAAAAAAATTTGCTGAAAAAGAGAGGATTCTAGAAGATGAGAACAACCGCCTTAATTG  
CAAAATTCAGAAGCGATGGATATGCAGATGCCTTGCTCCTACCGTGTACAACCAATTCAGCCAAATTTAC  
ATGATCGCTTTTAA

>P.maximowiczii\_GLO1

ATGGGGAGAGGAAAGATAGAGATAAAGAGGATTGAAAACCTCAAATAATAGGCAGGTGACTTATTCAAAGAG  
GAGAAATGGGATCATAAAAAAGGCAAAGGAGATCGCAGTTTTGTGCGATTCCCAGGTCTCTCTTGTTATTT  
TTGCTACCTCTGGTAAAATGCATGAATATTGCAGCCCTAAAACCTCCGTTGATTAACATCTTGGATGCATAC  
CAGAAGCAATCCGGGAATAGGCTGTGGGATGCTAAGCATGAGGACCTTAGCAATGAAATAGAAAGGATCAA  
GAAAGAAAATGACAATATGCAAATGAGCTCAGGCACCTTGAAAGGAGAAGATATACAATCTTTGCACCACA  
AGGAGCTTATGTCTTTAGAAGATGCCCTCGAAAACGGACTGACTTGTGTTCCGCAAAGAGAGATGGAGATT  
TACAGGATGGCTAAAGATAATTTACTGACAAGGAAAGGATTCTGGAAGATGAGAACAGAAGCCTTACTTA  
CCAAATGCACCACCTAGTGATGGATATAGAAGGTGAAGAGATGGAAAATGGGTACCAGTATCAACCTCAA  
TGCCTTTCTCCTTTTCGTGTGCAGCCAATTCAGCCAAATTTACAAGAGAGAATTTAA

>P.maximowiczii\_GLO2

ATGGGGAGAGGAAAGGTAGAGATAAAGAGAATTGAGAACCCCAATATTAGGCAGGTGACTTATTCAAACAG  
GAGGAATGGAATAATGAAAAAGGCTAAGGAGATCTCAGTTTTGTGTGATGCTCAGGTCTCTCTTGTTATAT  
TTGCCAACTCTGGTAAGATGTATGACTACTGCAGTCCTAATTCCTCGTTAATTAACATCTTGGATGCATAT  
CAGAAGCAATCCGGGACTAGGCTGTGGGATGCTAAGCATGAGAACCTTAGCAATGAAATGGGAGGGTAAA  
GAAAGAGAATGACAACATGGAAAATGAGCTCAGATACTTGAAGGGAGAAGATATACATTTGCACCACAAGG  
AGCTCATGTCTATAGAGGATGCACTGGAAAATGGACTTATTCGTGTTCCGCGACAGACAGATGGAGATCTAC  
AGGATGGCAAAGAAAATTTTCGCTGAAAAAGAAAGACTTCTGGAAGATGAAAACAAGCGCCTTAGCGACAA  
ATTTCAACAAGTGATGGATATGCAGATGCCTTGCTCCTTTTCATGCAAAACCAATTCAGCCGAATTTAAATG  
ATCGGGTTTAA

>E.ribes\_GLOx

ATGGGGAGAGGAAAGATAGAGATAAAGAGAATAGAGAACTCAAACAACAGGCAAGTGACTTATTCAAAGAG  
GAGAAATGGTTTTAGTAAAAAAGGCTAAGGAGATCTCAGTTCTGTGTGATGCTAAGGTCTCTCTTCTCATTT  
TTAATAGCTCTGGTAAGATGCATGAATACTGCAGCCCTAAGTTAATTAAGATCTTGGATGCATACCAGAAG  
CAATCTGGGAATAGGTTGTGGGATGCTAAGCATGAGAACCTCAGCAATGAGATTGAAAGGATCAAGAAAGA  
GAATGACAACATGCAAATGAGCTCAGGCACCTTGAAGGGAGAGGATATAACATCTTTGCACCACAAGGAGC  
TTATGTCTATAGAAGATGCTCTAGAAAATGGACTTACTTGTGTTCCGCGACAGACAGATGGAGATTTATAAG  
CTGGCTAAGAAAAATTTTGCTGATAAGGAAATGATTCTCGAAAATGAGAACAAGCGTCTTAACTACCAATT  
GCACCACCAATGATGGATATGGAAGGTGGAGAAATGGAAAATGAGTATCATTACCAGACTCAGGTGCCTA  
ATTTCTCCTTCCGTGTGCAACCAATTCAGCCAAATTTACATGGGCAAGTTTAA

>E.ribes\_GLOy

ATGGGGAGAGGTAAGATAGAAAATAAAGAGGATTGAGAACTCAAATAATAGGCAGGTGACTTATTCAAAGAG  
GAGAAATGGGATAATTA AAAAGGCTAAGGAGATATCAGTTCTTTGTGATGCTCAGGTCTCCCTTGTAATCT  
TTGCTAGCTCTGGTAAGATGCATGAATACTGCAGCCCTAATTCGTGTTGATTAACATCTTGGATGCATAC  
CAGAAGCAATCTGGGACTAGGTTGTGGGATGCTAAGCATGAGAACCTCAGCAATGAAATGAAAGGATCAA  
GAAAGAGAATGACAACATGCAAATGAGCTCAGGCACCTTGAAAGGAGAAGACATAAATCTTTGCACCACA  
AGGAGCTCATGTCTATGGAAGATGCCCTTGAAAATGGACTCACTTGCATTCCGCGAGAGACAGATGGAGATT  
TACAGGATGGCCAAGAAAAATTTGCTGATAAGGAAAGGATACTGGAAGGTGAGAACAAGCGCCTTAGTTA  
CCAAATGCATACCAAGTGATGGATATGGAAGGTAGAGAGATGGAAAATGACTACAATACCAGCCTCAGA  
TGCCTTTTCCCTTTTCGTGTGCAACCAATTCAGCCAAATTTACATGAACGATTTTAA

>E.sessiliflora\_GLOx

ATGGGGAGAGGAAAGATAGAGATAAAGAGAATAGAGAACTCAAACAACAGGCAAGTGACTTATTCAAAGAG  
GAGAAATGGTTTTAGTAAAAAAGGCTAAGGAGATCTCAGTTCTGTGTGATGCTAAGGTCTCTCTTCTCATTT  
TTAATAGCTCTGGTAAGATGCATGAATACTGCAGCCCTAATTCGTGTTAATTAAGATCTTGGATGCATAC  
CAGAAGCAATCTGGGAATAGGTTGTGGGATGCTAAGCATGAGAACCTCAGCAATGAAATGAAAGGATCAA  
GAAAGAGAATGACAACATGCAAATGAGCTCAGGCACCTTGAAAGGAGAAGACATAAATCTTTGCACCACA  
AGGAGCTTATGTCTATAGAAGATGCTCTAGAAAATGGACTTACTTGTGTTCCGCGACAGACAGATGGAGATT  
TATAAGCTGGCTAAGAAAAATTTGCTGATAAGGAAATGATTCTCGAAAATGAGAACAAGCATCTTAACTA  
CCAATGCACCACCAATGATGGATATGGAAGGTGGAGAAATGGAAAATGAGTATCATTACCAGCCTCCTC  
AGATGCCTAATTTCTCCTTCCGTGTGCAACCAATTCAGCCAAATTTACATGGGCAAGTTTAA

>E.sessiliflora\_GLOy

ATGGGGAGAGGTAAGATAGAAAATAAAGAGGATTGAGAACTCAAATAATAGGCAGGTGACTTATTCAAAGAG  
GAGAAATGGGATAATTA AAAAGGCTAAGGAGATATCAGTTCTTTGTGATGCTCAGGTCTCCCTTGTAATCT  
TTGCTAGCTCTGGTAAGATGCATGAATACTGCAGCCCTAAGTTGATTAACATCTTGGATGCATACCAGAAG

CAATCTGGGACTAGGTTGTGGGATGCTAAGCATGAGAACCTCAGCAATGAAATTGAAAGGATCAAGAAAGA  
GAATGACAACATGCAAATTGAGCTCAGGCACCTGAAAGGAGAAGACATAAATTCTTTGCACCATAAGGAGC  
TCATGTCTATGGAAGATGCCCTCGAAAATGGACTCACTTGCATTTCGCGAGAGACAGATGGAGATTTACAGG  
ATGGCCAAGAAAAATTTTGTCTGATAAGGAAAGGATACTGGAAAGATGAGAACAAGCGCCTTAGTTACCAAAT  
GCATACCAAGTGATGGATATGGAAGGTAGAGAGATGGAAAATGACTACAATTACCAGCCTCAGATGCCTT  
TTCCCTTCCGTGTGCAACCAATTCAGCCTAATTTACATGAACGATTTTAA

>M.indica\_GL01

ATGGGGAGAGGAAAGATAGAGATAAAGAGAATAGAAAATCAAAGCAACAGGCAGGTCACCTACACAAAGAG  
AAGAAATGGGATAATCAAAAAGGTTAAGGAGATCACTGTTCTTTGTGATGCTAAGGTCTCTCTTGTCAATTT  
TTAGCAGCTCTGGTAAGATGGTTGACTACTGCAGCCCTAATTTTCCGTTGATTAACATCTTGGATGCATAT  
CAGAAGCAAACCTGGAGATAAGTTGTGGGATGCTAAGCATGAGAACCTCAGCAATGAAATTGATAGGATCAA  
GAAAGAGAATGACAACCTGCAGATTGAGCTCAGGCACCTGAAAGGAGAAGACATACAATCTTTGCACCACA  
AAGAGCTCATGTCTATGGAAGAAGCCCTGGAAAATGGACTTGCTAGTATTTCGCGAAAAGACAGGCGGAGATT  
TTCAGGATAACAAAAGGAATCATGAGGATAAGGAAAGAATGCTGGAGGAGGAGTACAAGTGCCTTAGCTT  
GCAAATTTATGGATATGGAGGGCGGTGGAAAGATGGAGAATGGGTATCATCAGCAGCAGCAGCAACAAATGC  
AGATGGCGCCTTTCTCCTTCAGGGTGCAGCCAATTCAGCCAACTTACATGAGCGATTTTAG

>M.japonica\_GL01

ATGGGGAGAGGAAAGATAGAGATAAAGAGGATAGAAAATCAAAGCAACAGGCAGGTAACCTACACAAAGAG  
AAGAAATGGGATCATCAAAAAGGTTAAGGAGATCACTGTTCTTTGTGATGCTAAGGTCTCTCTTGTCAATTT  
TTAGCAGCTCTGGTAAGATGGTTGACTACTGCAGCCCTAATTTTCCGTTGATAAACATCTTGGATGCATAT  
CAGAAGCAAACCTGGAGATAAGTTGTGGGATGCTAAGCATGAGAACCTCAGCAATGAAATTGATAGGATCAA  
GAAAGAGAATGACAACATGCAGATTGAGCTCAGGCACCTGAAAGGAGAAGACATACAATCTTTGCACCACA  
AAGACCTCATGGCTATGGAAGAAGCCCTGGAAAATGGACTTGCTAGTATTTCGCGAAAAGACAGGCGGAGATT  
TTCAGGATAACAAAAGGAATCATGAGGATAAGGAAAGAATGCTGGAGGAGGAGTACAAGTGCCTTAGCTT  
GCAAATTTATGGATATGGAGGGCGGTGGAAAGATGGAGAATGGGTATCATCAGCAGCAACAAATGCAGATGG  
CGCCTTTCTCCTTCAGGGTGCAGCCAATTCAGCCAACTTACATGAGCGATTTTAG

>E.ribes\_CYP734A51

ATGTACCTGTTTTTGTCTTAAGTGGTTTGTATATTTGTGTTTTGGTTTTTTTTGGTGAGAGTGGGTGATTA  
CCTGTGGTGGAGGCCAGGAGAATAGAGGTGCACTTCTCTAAGCAAGGGATTAGAGGCCCAAATACCATT  
TCTTCTTAGGTAACACAAAGGAGCTTGTGGCTTTGATGGTGAAGCTGCTTCTCAAACTTGCCTATCTCT  
CAACACAACATTTCTCCCTGGGGTTCTCCCTTCTACCACCATTTGGAAGAAAATTTATGGGACAACATTTCT  
AGTGTGGTTTCGGACCAACGGCTCGTCTCACGATATCTGATCCGGTCCTAATCCGAGAGGTTTTGATAGTAA  
AATCAGAAATTTTGGAGAAAACGGAGTCACCCCAACATGTTTCGGAAGCTTGAAGGTGATGGACTGCTTACG  
CTCAAAGGAGAGAAATGGGCTCACCACAGAAAATAATCACTCCATCCTTCTACATGGATAATCTCAAGCT  
CATGATGCCATAATGGGAAAGAGCATGGAGAAGATGTTGGAGAAATGGGTAGAAATTTCTAAAAGTGGGA  
GTGTGGAAATAGAGGTTTACATTTGGTTCCAAGGTTTGGCAGAGGAGATTATTACCCACACTGTATTTGGG  
AGTAGCTATCAACAAGGAAAATCTATATTTGAGTTACATTCACAAAAATGATACATGCTATTGGCTCTTA  
CAACAAGTCTTCTTCCCGGATATAGGTTCTCCCTACTAAAAGAATAGACAATCTTGGAACTGGATA  
GAGAAATCGAAAATCCTTGACCAAGCTCATAGACAATCGGATCAAGGCTTACAATGTCAACCAATCGATC  
GCTTCGGATAACTGCCCGAACGATTTATTGGAATTCATGTTCAAAGCCAACATAAAAAACGAGACACAACA  
ACCTGCTTCTAATCTTATTATTCGTCTCGGCGCCATCAGTGATTACGACCCACGATATCATCGAGGAGT  
GCAAAACCATCTTCTTTGCCGGGAAACACACCACGTGCGCCCTGATGACGTGGACCACTGTGTTACTAGCG  
ATGCACCTCAATGGCAGGAACTCGCACGCGAAGAGGTGCTGACGGTGTGCGGGGCACGTGACGTACCCAC  
TAAGGATGATGTGGCTAAACTTAAGACGCTGAGTATGATACTGAACGAATCCCTGAGACTATACCCACCGG  
CCGTTGCCTTATTGAGACGGGCAAAGTGTGACGTAGAGTTAGGCGGATGCACAATCCACATGGGACCGAG  
CTTCTAATGCCAATCCTGGCCGTCCATCACGACCAAGGAATGTGGGGCCAGGATGCGACCGAATTAACCC  
GGCCCGCTTTGCCCGAGGCGTGGCCACGCAGCAAAGAACCCGATGGCTTTTCATGCCTTTTCGGGCTCGGGG  
CCCGCAGATGCATTGGGCAAACTTGGCCGTGCTCCAGACCAATTAGCCATTGCTATGATCCTGCAACGG  
TTCTCATTCGATCTTGCACCGAGCTATCAGCACGCACCGACAGTTGTTATGCTCCTTAATCCCAATATGG  
CGCGCCATCGTCTTTCACATATTGTAG

>P.forbesii\_CYP734A50

ATGGAGAGGGAGTCTATGTTATGGTTCTTTCTTGTGTGTTATTATATATATATGGTTTTTTATTTTCTGAT  
GAGAGCGGGAGATTACATATGGTGGAGACCCAAGAGAATGAGGTGCACTTCTCTAAGCAAGGTATTTCGTG  
GGCAAAGTATCATTTTTTATTAGGCAACACAAAGGAGCTTCTTGGTTTTTATGGTTAAGGCTGCTTCTCAA  
TCCTTGCTCTCTCATACATACCAGTCTCCCTAGGGTTCTCCCTTCTATCACCAATGGCAGAAATTATA

TGGTAGAACATTTTTAGTGTGGTTTGGACCTACGGCTCGTCTCACTGTGTCTGATCCGATTCTTATCAAGG  
ATATTCTCATAAATAGATCGGAGTTATTTGAGAAAGTTGAGTCTCCCCACATGTTAGAAAACCTGAAGGT  
GATGGCCTGGTTACTCTCCAAGGAGAGAAATGGGCACATCACAGAAAAATCATTACTCCGTCCTTCTACAT  
GGATAATCTCGAGCTTATGGTGCCTATTATGGGAAAGAGTATGAGAAAGATGGTAGACGATTGGTTCAAAA  
TGTCAAAAGGTAGTAAGATTGAAATTGATGTGTACGTTGGTTCCAAGAGTTGACGGAGGAAATTATTACG  
CACACATTTCTTTGGGAGAAGCTATGAAGAAGGCAAAAAAATATTTGAGTTACACTCAAGGAATATGATATA  
TGCAATTGGCTCCTATAACAAGATCATCATCCCGGGATACAGGTTTCTCCCGATTAAACAGAATAGACAGT  
TTCGGAAACTGGATAGAGAAAATTGGAACATCTTTGAAGAAGATCATAGACCACCGACTGAAGGATTATAAT  
AACAGTGGAGTACGGTCGGCAAAGTATCCAACGATCTATTGGAACCTCATGATTCAAGCCAGCATAAAAAG  
TGAACACACAAAAGAAATGTCAACTTGGGGTGTTCGCTTCTCAATCGCCTTCTGCATTTTTTTATTACGG  
CCTCTGATATCATCGAAGAGTGCAAAACAATGTTATTTGCTGGAAAGTACACCACCTCGTCCCTAATGACG  
TGGACTATTGTTCTCCTTGCTATGCACCCTCAGTGGCAGGAGCTGGCTCGCGAAGAGTCTTTCGAAACTG  
CGGGGATCATGATATTTCCACCAAAGTCTGTGGCAAACTCAAGACGCTGAGCATGATACTCAAGGAAT  
CACTGAGGCTGTATCCACCAGCAGTTGCCTTATTGAGACGGGCGAAGTGTGACATGGAATTAGGCGGTTGC  
ACGATCTTACGCCGACTGAGCTCATGTTGCCGATCCTGGCCGTCCATCATGCTCCAGTAATATGGGGCCA  
GGATGCAACCGAATTC AACCCAGCCAGGTTTTACAGAGGGTTTTCTCATGCTGCAAAGCATCTCACGGCCT  
TTATGCCGTTTTGGGCTCGGGGCTCGTAGATGCATAGGGGAAAACCTGGCCATGCTCCAGACTAAACTTGCC  
ATCGCCATGATTTTACAACAGTTCCTGTTTTGTTCTTGCCCGAGCTACCAGCACGCACCAACAGTTGTGAT  
GCTCCTTGATCCTCAATATGGTGCACCCATCACCTTTCATACGCTGTAG

>P.forbesii\_CYP734A51

ATGGAGGGGGCTACATGTACTTGGTTTTGCTTCTATGTTGTTTGTATATTTGGCTTTGGTTTTTTTGAT  
GAGAGTGAGTGATTACCTGTGGTGGAGGCCATAGGAGAATTGAGATGCACTTCTCTAAGCAAGGGATTAGAG  
GGCCTAAATATCATTTTTTCTTAGGTAACACAAAAGAGCTTGTGGGTTTAATGGTTAAAGCTGCTTCTCAA  
ACCTTGCCCTCTCTCATCACAACTTCTCCCTAGGGTTCTCCCTTCTATCACCATTGGAAGATAATCTA  
TGGTGCACATTTCTCGTGTGGTTTCGGACCAACGGCCCGTCTCACAGTGTCTGATACGTCCTAATCAGAG  
AGGTTTTGTTAGTAAAATCGGAATTATTTGAGAAAACCTGAGTCACCCACATGTTTCGAAAGCTTGAAGGT  
GATGGTTTACTTACCCTCAAAGGAGAGAAATGGGCTCACCCACAGAAAAATCATCACTCCATCGTTCTATAT  
CGATAATCTCAAGGTCATGGTTCCCATAATGGGGAAAAGCATGAAGAAAATGTTGGATAAATGGGTGGATA  
TATCAAAAAGTGGCAGTGTGGAAAATTGAGGTGTACATTGGTTCCAAGTTTAAACGGAGGAAATTATCACT  
CATAAGTGTGGGAGCAACTATGAACAAGGCAAGCTATTTTTGAGCTACATTCACAAAAAATGTTACA  
TGTTATTGGGTCCTACAACAAGGTCCTTATCCCGGATATAGGTTCCCTCCCACTAAAAAGAATAGACAAT  
CTTGAAAACCTGGATCGAGAAAATCGAAAAATCCCTGACGAAGCTCATTCAAGAGGATTAATGATTACAAT  
ATTAACGCATCGATAACATCCGATAAGTGTCCCAACGATTTATTGGGATTCATGATCAAAGCCAGCATAAA  
AATCGATACAAAACAAAATTCAACTTGGGTTTTCTTAATTCAGTTATTTCGTCATCGGCATCCGTGATCA  
CAACCCATGATATTATTGAGGAATGCAAAACTATATTTTTTGCCGGAAAACACACCACATCGGCCCTGATG  
ACGTGGACAACCTGTTCTCCTCGCTATGCATCCTAAGTGGCAAAAAATGGCGCGGAGGAGTCTTGAGAGA  
GTGCGGAAATCGTGATGTGCCTACTAAGGATGATGTGGCCAACTTAAAACGATGAGTATGATATTGAACG  
AATCGCTAAGATTGTATCCGCCAGCTGTCGCTTTATTGAGGCGGGCCAGGCGTGACGTGGAGCTCGGTGGA  
TGCACGATTCATGCGGGACTGAGTCCTCATGCCGATCCTGGCCGTCCATCACGATCCACAAATGTGGGG  
CCAGGATGCATCCGAGTTCAACCCGGCCCGATTGCCCCAAGGTGTGGCCCAAGCAGCTAAAGACCCGATGG  
GCTTTATGCCGTTTGGGCTTGGGGCCCGTAGATGTATTGGGCAAACTTGGCTGTGCTTCAAATAAATTA  
GCTATTGCTATGATTTTGCAACGGTTCTCGTTCGATCTTGACCCGACCTATCGGCACGCACCCACGGTTGT  
GATGCTTCTTAATCCTCAATACGGTGCGCCTATCGTATTTCTGTAATTAGCGGAAAAATCTTGA

>P.veris\_CYP734A50

ATGCAAGTGAGCTTTGTGTTGTGCTTCTTACTCTTATGTTTTTATATATATATAAATTTTTGCTTTCCTGAT  
TAGAGCGGGATATTATCTGTGGTGGAGGCCCAGGAGAATCCAGCTGCACTTCTCTAAGCATGGTATTAGAG  
GTCCAAACTACCACGTTCTTTACAGCAACACAAAGGAGCTTGTGATTTGACGGTTAAGGCTGCTTCTCAA  
ACCTTTCCTCGTCTCCTCATAACATTTGCCCTAAGGTTCTCCCTTCTATCACCAGTGAAGAAAATATA  
TGGTGCACATTTTTATTGTGGTTTGGACCAGTGGCTAATCTCACGCTGTCTGATCCGGTGTCTATCACAG  
AGATTTTGATTAGTAAATCATCGGAATTATTTGAGAAAACCTGAGTCACCCCAACATGTTAGAAAAGTTGAA  
GGTGATGGTTGATTACTCTTCGAGGAGAGAAATGGGTTACCACAGAAAAATCATCACACCATCCTTCTA  
CATTGATAATCTCAAGCTAATGGTGCCTATTATGGGAAATAGCATGGTAACGATGTTGAACAAATGGGTGG  
AGATTTCAAAAATAGTACCATCGAAATTGATGTGTACATTGGTTCCAAGATCTCACTGAGGAGATAATT  
AGCCACATAGCCTTTGGAAGAAGCTGTAAAGAGGGAAAACCAATATTTGCGTTACATTCACAAAATATGGC  
TTATGCAATTGGTTCTTATAACAAGTTCTTCAATTTACAGGTTTCTTCCCACTAAACAGAATAGGC  
AATTTTGCAAACCTGAATAGAGAAAATGAAAATATCCTTACGAAGCTGATAAACCAAAAGAAATGAAGGACAAT  
AATAATTTTATAGGAGCATCTTCAGAAAAGTGTCCAGACGATTTATTGGAACCTCATGGTTAAAGCCAGCAA  
AAAGAATGTTACAGACAAAGCAAAATGTCAGCACGGGATGCATTTACAACCTACAACATAATTGAAGAGTGCA

AGACGATCCTATTTGCTGGAAAATACACTACCTCGGCCATGATGACGTGGACCACTGTTCTCCTTGCAATG  
CACCTCTGTGGCAGGAAGTGGCTCGCAAAGAGGTCTTAAGGGTGTGCATGGATCACGATTTTCCCACAAA  
AGATGATGTCACGAACTTAAACACTCAGCATGATATTAATGAATCACTAAGACTTTACCCACCAGTTG  
TTGCTTACTGAGACGGGCAAGAGTGACATGGAGTTTGGTGGCTGTACGATTTTACGAGGGACGGAGCTT  
CTGATCCCAATTGTGGGCATCCATCACGATTTAGAAATATGGAGTCAGGAAGCAACCGAGTTCAATCCGTC  
AAGGTCGCTCCAGGGGTTTCCAAGGCCACAAAGCATCCCACAGCCTTCATGCCATTCGGACTAGGGAATC  
GTAGATGCGTCGGGCAAAATTTGGCTATCCTCCAGACTAACTGGCCATTGCCATGATCTTAAAACGATTT  
TCATTCAATCTTGCCCAAGCTATGAGCACGCACCAACAGTTGTGATGTTTCTTGATCCTCAATACCGTGC  
ACCCATAACCTTTCATACATTGTAA

>P.veris\_CYP734A51

ATGGGTTACTGGTTTTTGTCTCATGTGGTTTTGTTATATTTATTTTTGGTGTGTTGTGATGAGAGTGAGTGA  
TTACCTGTGGTGGAGACCCAAGAGAATTGAGGTGCACCTTCTCTAAACAAGGGATTAAGGTCCTAAATATC  
ATTTCTTCTTAGGTAACACAAAGGAACCTGTGGATTTGATGGTTAAATCTGCTTCTCAAACCTTGCCTCTT  
TTTCATCATAATATTCTCCCTAGGGTCTTCCCTTTTACCACCCTGGAAGAAAATTTATGGTGAACATT  
TATAGTGTGGTTCGGACCAACGGCTCGTCTTGTGGTGTCTGACCCGCTCTTAATTAGAGAGGTTTTTATAT  
CAAAATCAGAATCATTTGAGAAAACCGAGTCTCCTCCTCATGTTAAAAAGCTCGAAGGGGATGGCCTTCTT  
ACCCTCGAAGGAGAGAAATGGGCTCATCACAGAAAATTTCTACTCCATCTTTCTATATCGATAATTTGAA  
GCTCATGGTTCCTATTATGGGGGAAAGCATGAAGAATATGTTGAATAAATGGGTGGATATATCAAAATGTG  
ACACTATGGAATTTGAGGTGTACATTTGGTTCCAAAATTTAACTGAAGAGATTATCACACATGCAGTATTT  
GGGAGCAGCTATGAACAAGGCAAGCTATTTTTGAGTTACATTCACAAAAAATGATCCATTTATTTTGCCTC  
CTATGACAAGGTCTTCATCCCTGGATATAGGTTTTTTCCCACTAAAAAGAATAGACAGTCTTGGAAATTGG  
ATCGAGAAATTGAAAATTCCTCGACGAAGCTTATAAACGAACGGATTAAGGCTTACACTACCGAAGGATCG  
ATGGCATTGGATGAGTGCCTCAAGGATTTATTGGGATTCATGATTAGAGACAGCATAAAAAACGAGACTAA  
AAAAACATCAACTTGGGATTTTACCACCCACGATATTATCGAAGAGTGCAAAACCTTATTTTTTGTGGAA  
AACATACGACCTCGGCCCTGATGACGTGGACAACGGTCTCTTGGCAATGCATTCTAAAATGGCAGGAATTG  
GCGCGCGATGAGGTTGTAAGGGAGTTCCGGAGCCGGTAATGTGCCTACAAAAGACGACGTGGCTAAACTTAA  
GACGCTGAATATGATACTCAACGAATCCCTAAGACTTTACCCGCCAGTTGTTGCCTTACTACGACGAGCCA  
AGTGTGACGTGAGCTAGGTGGCTGCAAAATCCCATTAGGTACCGAGCTCCTCATGCCAATCCTAGCGGTC  
CATCACGACCCAGAAACATGGGGTCCAGATGCAACCGAATTTAACCCAGGCCGGTTCACGCAAGGTGTGGC  
TCAGGCAGCAAAAAATCCGATGGCATTTCATGCCATTTGGGCTCGGGGCCCGAAGATGACTGGGCAAAACT  
TGGCTATGCTACAAACAAAACCTAGCTATCGCTATGATATTGCAACGGTTTTTCGTTTGTCTTGCACCGAGC  
TATCAACACGCACCAACAGTTCGTGATGCTCCTTAATCCACAATATGGCGCACCCATCGTATTTCAAAGGCT  
AGATAAAAAGATCATCAAATGATCAAGATATATA

>P.oreodoxa\_CYP734A50

ATGGAGGGGGAGTCTATGTTATGGTTCCTTGCTTCTGTGTGGTCATATATATATGGTTTTTTATTTTCTGAT  
GAGAGCGGGAGATTACATGTGGTGGAGACCCAAGAGAATTGAGGTGCACCTTCTCTAAGCAAGGTATTTCGTG  
GGCCAAAGTATCATTTTTTATTAGGCAACACAAAGGAGCTTCTTGGTTTTTATGGTTAAGGCTGCTTCTCAA  
TCCTTGCTCCCTCTCATACACAAGTCTCCCTAGGGTCTCCCCTTCTATACCAATGGCAGAAGTTATA  
TGGTAGAACATTTTTAGTGTGGTTTGGACCTACGGCTCGTCTCACCGTGTCTGATCCGATTCTTATCAAGG  
ATATTCTCATAAGCAGATCGGAGTTATTTGAGAAAGTTGAGTCTCCCCACATGTTAGAAAACCTGAAGGT  
GATGGCCTGGTTACTCTCCAAGGAGAGAAATGGGCACATCACAGAAAATCATTACTCCGTCCTTCTACAT  
GGATAATCTCGAGCTTATGGTGCCTATTATGGGAAAGAGTATGAGAAAATGGTAGACGATTGGTTCAAAA  
TGTCAAAAGGTAGCAAGATTGAAATGACGTGTACGTTGGTTCCAAGAGTTAACGGAGGAAATTATTACG  
CACACATCTTTGGGAGAAGCTATGAAGAAGGCAAAAAAATTTGAGTTACACTCAAGGAATATGATATA  
TGCAATTGGTTCCTATAACAAGATCATCATCCCGGATACAGGTTTCTCCCGATTAAAAAGAATAGACAGT  
TTAGGAAACTGGATAGAGAAATGGAACATCTTTGAAGAAGATCATAGACCACCGAATGAAGGATTATAAT  
AATAGTGGAGTACCGTCCGCAAGTATCCAACGATCTATTGGAACCTCATGATTAAAGCCAGCATAAAAAG  
TGAACACACAAAAGAAATGTCAACTTGGGGTGTGTTGACTTCTCAATCGCCTTCTGCATTTTTTATTACGG  
CCAATGATATCATCGAAGAGTGCAAAACCATCTTATTTGCTGGAAAGTACACCACCTCGTCCCTAATGACG  
TGGACTATTGTTCTCCTTGCTATGCACCTCAGTGGCAGGAGCTGGCTCGCGAAGAGGTCCTTAGAAACTG  
CGGGGATCATGGTATTCCCACCAAGGTCATGTTGCAAAACTCAAGACACTGAGCATGATACTCAAGGAAT  
CACTGAGGCTGTATCCACCAGCAGTTGCCTTATTGAGACGGGCGAAGTGTGACATGGAATTAGGCGGTTGC  
ACGATCTTACGCCGACTGAGCTCATGTTGCCGATCCTGGCCGTCATCACGCTCCAGTAATATGGGGCCA  
GGACGCAACCGAATTCACCCAGCCAGGTTTGCACGAGGGGTTTTCTCATGCTGCAAAAGCATCTCACGGCCT  
TTATGCCGTTTGGGCTTGGGGCTCGTAGATGCATAGGGCAAAACTTGGCCGTGCTCCAGACTAAACTTGCC  
ATCGCCATGATTTTACAACAGTTCTCGTTTCGTTCTTGGCCGAGCTACCAGCACGCACCAACAGTTGTGAT  
GCTCCTTGATCCTCAATATGGTGCGCCATCACCTTTCATACGCTGTAG

>P.oreodoxa\_CYP734A51

ATGGAGGGGGGCTACATGTACTTGGTTTTGCTTCTATGTTGTTTGTATATTTGGCTTTGGTTTTTTTTGAT  
GAGAGTGAGTGATTACCTGTGGTGGAGGCCCTAGGAGAATTGAGATGCACTTCTCTAAGCAAGGGATTAGAG  
GGCCTAAATATCAATTTTTCTTAGGTAACACAAAAGAGCTTGTGGGCTTAATGGTTAAAGCTGCTTCTCAA  
ACCTTGCCCTCTCTCATCACAACTTCTCCCTAGGGTTCTCCCCTTCTATCACCATTGGAAGATAATCTA  
TGGTGCACATTTCTCGTGTGGTTCGGACCAACGGCTCGTCTCACGGTGTCTGATCCGTCCCTAATCAGAG  
AGTTTTGTTAGTAAAATCGGAATTATTTGAGAAAACCTGAGTCACCCCTCATGTTAGAAAACCTGAAGGT  
GATGGTCTACTTACCCTCAAAGGAGAGAAAATGGGCTCACCCACAGAAAATCATCACTCCATCGTTCTATAT  
CGATAATCTCAAGGTCATGGTTCCTATTATGGGGAAAAGCATGAAGAAAATGTTGGATAAATGGGTGGATA  
TATCAAAAAGTGGCAGTGTGGAAAATGAGGTGTCACATTGGTTCCAAAGTTTAAACGGAGGAAATTATCACT  
CATAAGTGTGGGAGCAACTATGAACAAGGCAAAGCTATTTTTGAGCTACATTACAAAAAATGTTACA  
TGCTATCGGGTCTACAACAAGGCTTTTATCCCCGGATATAGGTTCCCTCCCCACTAAAAAGAATAGACAAT  
CTTGAAAACCTGGATCGAGAAAATCGAAAAGTCCCTGACGAAGCTCATTACAAGCGGATTAATGATTACAAT  
ATTAACGCATCGATAACATCCGATAAGTGTACAACGATTTATTGGGATTTCATGATCAAAGCCAGCATAAA  
AATCGATGCAAAAACAAAATCAACTGGGTTTTCTTAATTTCTAGTTATTCGTATCGGCATCCGTGATCA  
CAACCCATGATATTATTGAGGAATGCAAAAACCTATTTTTTGGCCGAAAACACACCACCTCGGCCCTGATG  
ACGTGGACAACCTGTTCTCCTCGCAATGCATCCTAAGTGGCAAAAACCTGGCGCGGAGGAGGTCTTGAGAGA  
GTGCGGAAAATCGTGACGTGCCTACTAAAGATGATGTGGCAAAAACCTAAGACGCTGAGTATGATACTGAACG  
AATCGCTAAGATTGTACCCGCCAGCTGTGCGCTTACTGAGGCGGGCCAGGCGTGACGTGGAACCTCGGTGGA  
TGCACGATTCCTGTCGGGACCGAGCTCCTGATGCCGATCCTGGCCGTCCATCACGATCCACAAATGTGGGG  
CCAGGATGCAACCGAATTAACCCGGCCGATTTGCCCAAGGCGTGGCCCAAGCAGCTAAAGACCCGATGG  
GCTTTATGCCTTTTGGGCTTGGGGCCGAAGATGTATCGGCCAAAACCTGGCTGTCTTCAAACCTAAATTA  
GCTATTGCTATGATTTTTGCAACGGTTCTCGTTCGATCTTGACCCGACCTATCGGCATGCACCGACGGTTGT  
GATGCTTCTTAATCCTCAATACGGTGGCGCCATCGTATTTCTGTAATTAGCGGAAAAATCTTGA

>P.maximowiczii\_CYP734A50

ATGGAGGGGAACAATATGTTCTGCTTCTTGCTTCTATGTGTTTTCTTATATATGTTTCTTGTTTTTCTGTT  
GAGAGTAGTAGATTACCTCTGGTGGAGGCCCAGGAGAATCGAAGTGCCTTCTCTAAGAACGGTATTAGAG  
GGCCAAAAGTATCATTTTTTCTTAGGCAACACAAAGGAGCTTGTGGTTTTGATGGCTAAGGCTGCCTCCCAA  
ACCTTGCCATTTTCTCATATAACATTTCTGCCTAAGGTTCTCCCCTTCTATCACCATGGCAGAAAATATA  
TGGTGCACATTTCTTAGTGTGGTTCGGACCAACGGCTCGGCTCACTATGTCTGATCCAATTTCTAATTAAG  
AGATATTGATAACTAAATCAGAGTTATTTGAAAAAATTGAGTCACCCCCACATGTTAGAAAACCTGAAGGT  
GATGGCTTGGTTAATCTCAAAGGAGAGAAAATGGGCTCACCCACGAAAATCATCACTCCGTCTTCTACAT  
TGATAATCTAAAGCTTATGGTGCCTATTATGGGAAAAGAGTATGGGAAAAGATGTTAGATAGATGGGTAGATA  
TGTCAAAAGGTAGCACGATTGAAAATGACGTGTCACCTTGGTTCCAAGATCTGACGGAGGAGACTATTACC  
CGCACAGTTTTTGGGAGAAGCTATGAACACGGGAAAACAATCTTTGCGTTACATTCTCAAATATGATTTA  
CGTTATTGGTCTTATAACAAGATCTTCATCCCAGGATACAGGTTTCTCCCAACTAAAACAGAATATAGAGT  
TTTGGACACTTGATCGAAAAATAAAAATATCATTGATGAAGCTGATAGACAACCGAATGGAGGATTATAAT  
AATAATGGAGGATCTTCAGGAAAAGTGTCCAGACGATTTATTGGATCTCATGGTTAAAGCCAGCATAAAAAG  
CTGTGCGACATCGCAAATGTCAGTACGGGATGCTTTTTAATTTCTTATTTTTGGCCCCGTGCATCCGTGATAA  
CGACCTCCGATATCATGGAAGAGTGCAAGAGCATCTTATTTGCTGGAAAAAATACCACCTCGGCCCTGATG  
ACGTGGACCACTGTTCTCCTTGCCATGCACCCTCACTGGCAGGAACTGGCACGCAAGAGGTCCTAAGGGT  
GTGCCGGGATGGTAATGTTCCACCAAAGATGACGTGGCAAAAACCTAAGACACTGAGCATGATACTATATG  
AATCACTGAGACTTTACCCACCAGTAGTTGCCCTACTGAGACGGGCCAAGTGTGACATGGAGTTAGGTGGA  
TGCACGATCTTAAGTGGGGCTGAGCTCCTCATCCCAATCCTGGGCATCCACCACGCTCAGGAATCTGGGG  
TCAGGAAGCATCAAATTAACCCGTCCAGATTTGCCAGAGGGGTCGCTCATGCTACAAAGAAGCACACAA  
ACTTTATACCATTTGGGCTCGGGAATCGTAGATGCGTGGGCAAAACATGGCCATGATCCATACTAAACTG  
GCCATCGCCATGATCTTAAACGATTTCTCATTTCGGCCTCGCCCCGAGTTATCAGCACGCACCAAGAGTTGC  
GATGTTCTTGATCCTCAATATGGTGTGCCCATCATCTTTCATAAACTATAA

>P.maximowiczii\_CYP734A51

ATGGAAGGGGAACACATGTACTTGGTTTTGGCTTCTAAGTGGTTTTGTTATATTTGATTTTGGT  
GAAAGTGGGTGATTACCTATGGTGGAGGCCCAGGAGAATTGAGGTGCACTTCTCTAAGCAAGGGATAACAG  
GGCCTAAATACCATTTCTTCTTAGGTAACACAAAGGAGCTTGTAAAGTTTGTGGTTAAAGCTGCTTCTCAA  
ACTTTGCCCTCTCTCAACACAACATTTCTCCCTAGGGTTCTCCCCTTCTATCACCATTGGAAGAAAATTTA  
TGGTGAACATTTCTCGCGTGGTTCGGACCAACTGCTCGTCTCATGGTGTCTGATCCAGTCCCTAATCAGAG  
AGTTTTAATCGTGAATCGGAATTATTTGAGAAAACCGAGTCACCCCCACATGTTAGAAAAGCTTGAAGGC  
GATGGCCTGCTTACCCTCAAAGGAGAGAAAATGGGCTCACCATAGAAAATCATCACTCCGACGTTCTACAT  
CGATAATCTCAAGCTCATGGTTCCTATTATGGGGAAAAGCATGAACAACATGTTGGAAAAATGGATGGGAA  
TATCAAAAAGTGGTGTGGAAAATGAAGTGTACATTGGTTCCAAAGTTTAAATGGAGGAGATTCTTACCCAC  
ACGGTATTTGGGAGCAGCTATGAACAAGGCAAAGCTATATTTGAGTTACATTCACAAAAAATGATCCATGC

AATTGGGTCCTATAACAAGTTCTTCATCCCCGGTTATAGGCTCCTGCCACTAAAAAGAATAGACAATCTT  
GGAAATTGGATCGAGAAATTGAAAAATCCTTGACGAAGCTCATAAACCAACGGATTAATGCTTACAATATG  
GAAGGATCGATGGCATTGGATAAGTGCCCAACGATTTATTTGGGATTCATGATCAAAGCTATCATAGAAAA  
CGAGAATAAACAAACACCAACTTGGGGAAAATCTAATTCTTATTCTCCGTCCTCGGCATCCGTTATCACGA  
CCCACGATATAATTGAAGAGTGCAAACCATATTTTTTGGCGAAAACATAACCACTTCGACCCTGATGACG  
TGGACAACGTCTCCTGGCAATGCACCCGAAGTGGCAGGAACTTGCACGCGAGGAGGTCTTGAGAACGTG  
CGGGTTCGATGAACCTACTAAGGATGATGTGGCAAACTTAAGACGCTAAGCATGATACTCAACGAATCAC  
TAAGATTGTACCCACCAGCTGTGCCTTACTGCGGCGGGCCAAGCATGACATGGAGCTGGGAGGCTGGACA  
ATCCCATGTGGGACCGAGCTCCTCATGCCGATCCTGGCCCTCCATCACGACCCAGTATTGTGGGGTCAGGA  
TGCAACAGAATTCAACCCGGCCCGTTTCGCCCAAGGCGTATCCACGCAGTAAAACATCCAACGGCCTTCA  
TGCCATTTGGGCTCGGGGCCCGCAGATGCGTTGGGCAAACTTGGCTGTGCTCCAGACTAAATTGGTCATT  
GCTATGATATTGCAACGGTTCTCATTTGATCTTGACCCGAGCTACCAGCATGCACCAACGATTGTGATGCT  
TCTTAATCCTCAATATGGTGCACCCGTGATGTTTTACACACTCCATGATAAATCTTTAGATCACGAGGCAC  
GAGTTCATGGTTACTCAAATACATACGTGTAA

>E.sessiliflora\_CYP734A51

ATGTACTTATTTTTGCTTCTAAGTGGTTTTGTTATATTTGTGTTTTGGTTTTTTTTGGTGAGAGTGGGTGATTA  
CCTGTGGTGGAGGCCAGGAGAATAGAGGTGCACTTCTCTAAGCAAGGGATTAGAGGCCCAAATACCATT  
TCTTCTTAGGTAACACAAAGGAGCTTGTGGCTTTGATGGTAAAAGCTGCTTCTCAAACTTGCCTATCTCT  
CAACACAACATTCTCCCTGGGGTCTCCCTTCTACCACCATGGAAGAAAATTTATGGTACAACATTTCT  
AGTGTGGTTCGGACCAACAGCTCGTCTCACGATATCTGATCCGGTCTAATCCGAGAGTTTTGATAGTAA  
AATCGGACTTATTTGAGAAAACGGAGTCACCCCCACATGTTCCGGAAGCTTGAAGGTGATGGACTGCTTACG  
CTCAAAGGAGAGAAATGGGCTCACCACAGAAAATAATCACTCCATCCTTCTATATGGATAATCTCAAGCT  
CATGATGCCATAATGGGAAAAGAGCATGGAGAAGATGTTGGAGAAATGGGTAGAAAATTTCTAAAAGTGGGA  
GTGTGGAAATAGAGGTTTTACATTTGGTTCCAAGGTTTTGGCAGAGGAGATTATTACCCACACTGTATTTGGG  
AGTAGCTATCAACAAGGCAAACTATATTTGAGTTACATTCACAAAAATGATACATGCTATTGGCTCTTA  
CAACAAGGTCTTCTTCCCGGATATAGGTTCTCCCTACTAAAAGAATAGACAATCTTGAAACTGGATA  
GAGAAATCGAAAATCCTTGACCAAGCTCATAGACAATCGGATCAAGGCTTACAATGTCAACCAATCCATC  
GCTTCGGATAACTGCCCGAACGATTTATTGGAATTCATGTTCAAAGCCAACATAAAAAACGAGACACAAC  
ACCTGCTTCTAATTCTTATTATTCGTCTCGGCGCCATCAGTGATTACGACCCACGATATCATCGAGGAGT  
GCAAAACCATCTTCTTTGCCGGGAAACACACCACATCGGCCCTGATGACGTGGACCCTGTTTTACTAGCG  
ATGCACCCCTCAATGGCAGGAACTCGCACGCGAAGAGGTSCTGACGGTGTGCGGGGCACGTGACGTACCCAC  
TAAGGATGATGTGGTGAACCTTAAGACGCTGAGTATGATACTGAACGAATCCCTGAGACTGTACCCACCGG  
CTGTGCGCTTATTGAGACGGGCAAAAGTGTGACGTGGAGTTAGGCGGATGCACAATCCACACGGGACCGAG  
CTTCTGATGCCAATCCTGGCCGTCCATCACGACCAAGGAATGTGGGGCCAGGATGCGACCGAATTCAACCC  
GGCCCGCTTTGCCCGAGGCGTGGCCACGCAGCAAAGAACCCGATGGCTTTTCATGCCTTTCGGGCTCGGGG  
CCCGCAGATGCATTGGGCAAACTTGGCCGTGCTCCAGACCAATTAGCCATTGCTATGATCCTGCAACGG  
TTCTCATTCGATCTTGACCCGAGCTATCAGCACGCACCGACAGTTGTTATGCTCCTTAATCCCAATATGG  
CGCGCCATCGTCTTTCACATATTGTAG

>M.indica\_CYPa

ATGGAAGATCCCTTGTTCCTTACTTGATGAAGCTAATGTTTATCTCTATGATCGTTGTGGTTATTTTTATGAA  
AGTTGTGGTTTTCTTTGGTGGAGGCCAAGGAAAATGAAAGCCATTTCTCTAAGCAAGGCATTAGAGGAC  
CACCTTATAGGTTCTTTATTGGCAATACTAAGGAAATCTCAGCCTAATGATGCAGGCTTCTTCTCAGCCC  
ATGCCTTCTCTCACAAACATTCTCCAAGGGTCTCTCCTTCTATCATCATTGGAGAAAAATCTATGGTGC  
CACATTTCTAGTGTGGTTTTGGACCCACGGTCCGTCTTACCGTCTCCGATCCAGACCTGATTCGAGAAATTT  
TCACTTCAAAATCTGAGTGTATGAGAAGAATGAGGCTCACCCACTAATCAAACAACTTGAAGGAGATGGA  
TTGCTTAGCCTCAAAGGAGAAAAATGGGCACACCATAGAAAAATCATCACTCCTACCTTCCATATGGAAAA  
TCTCAAATGTTGATAACCGGTGGCTTCCAAAAATGTGTTGGAAATGTTGGATAAATGGATGGAGATAGGTA  
ATTCCGGGGAGGAAGTAGAAGTGAAGTCTCTGAGTGGTACAAAATGTTGACAGAAGATATAATTACCAGA  
ATGACATTTGGTAGTAGCTACGACCAAGGCAAGGCTATTTCCGACTACAAGTGAACAATGGCACTAGC  
TTCTGAGGCATTTCAAAAAGTCTTCATTCCTGGATTTAGATTCCTTCCCACGAAAAGGAACATGAAATCTT  
GGAAATTGACAAGGAAATCAACAAATCTCTAGTGAATCTTATCGATCGGAGGAGAGAGAATTCATTCAA  
GGAATCAAGAACATGGGCCTAAGGATTTATTAGGGCTTATGATTGAAGCAAACAAGAGATCGTTGGAATT  
CAATTCCTCGCCATCCTCAAACATCACGGTCCATGACATCGCCGAGGAATGCAAGAGCTTCTTTTTTCGCCG  
GCGGCCAAACGACTTCCAATTTGCTGACGTGGACGACAGTTTTGCTAGCTATGCACCCACAATGGCAGGAG  
CTGGCACGTGACGAGGTGCTTAGAGTGTGTGGGTACAGTGTGCTGCTCCAAAGATGACATTTGCCAAGCT  
TAAGACGCTGAACATGATTATCAATGAAACACTGAGACTTTACCCACCAATCGTGGCAACTATCAGACGGG  
CGAGAGCCGATGTGGAGCTCGGGGGATGTAAGGTTCCGTGTGGGACCGAGCTTTTAATACCAATCATAGCC  
GTCCATCATGATCAAGGCATTTGGGGCAATGATGTCAATGAGTTCAACCCCGATCGATTCTCTGATGGGAT



GGCCGAGCAGCGAAGCACCCCTACGGCCCTAATTCCATTTGGGCTCGGGGCCCGAACTTGCATTGGACAAA  
ATCTAGCAATCCTGCAAGCGAAGCTAACGTTTCGTATCATACTACAACGTTTTTGGCTTCGCTTGGCCCCG  
CAATATCAACACGCACCAACGGTCTAATGCTCCTTTACCCTCAACACGGTGCACCGATCATCTTTGACA  
TTTGGCAGATCCCCACAGTTGA

>M.indica\_CYPb

ATGGAGGAGCTTTTGGCTATACTTGTGAAGCTAATGGCAATATCTTTCATAGTTTTGGTATGTTTCTTGAA  
GGTTTTGATCTTGTGGTGGAGGCCAAGGAAGATTGAAGAGCACTTCTCAAAGCAAGGCATTAGAGGGC  
CTCCTTATTGCTTATTCATAGGCAACGCTAAGGAGCTTTTGGGACTTATGTTGAAGGCTTCTTCTCAACCC  
ATGCCTAATTTCTCTCACAACATTTCCCTAGGGTCTCTCTTTCTACCATCATTGGAGGAAAATCTATGG  
TGCAACATTTCTAGTATGGTTCGGACCCACTGTCCGTCTCACCGTGTCCGATCCAGACCTCATTAGAGAAA  
TTTTCACTTCCAAATCACAATTTTATGAGAAGAATGAAGCTCACCCACTAATTA AACAGCTTGAAGGTGAT  
GGCCTCCTTAGCCTCAAAGGGGAAAAATGGGCACAACATAGAAAAATCATAGCTCCAACCTTTTCATATGGA  
AAATCTCAAATTGCTTATACCGGTGGCGGCTCATAGTGTGATCGAAAAATTACACGAAGCGTTGGCAATGG  
CGGATTCTGGGGAGGTGGAAATTGAAGTCACAGAATGGTATAAATCATTAAACAGAAGAAATTTATTATTCGA  
ACAGCATTGGTAGTAGCTATGAAGATGGAAAAGCTATTTTTCACTACAAGCACAACAATTAGCCCTTGC  
ATCCGAGGCATTTCAAAAAGTTTTTCATCCCAGGCTATAGATTTTTTACCACAAAAGAGGAACATGAAATCCT  
GGAAATTGGATAAGGAAATCAAGAAATCCCTAGTGAAAGTCATCAATAGAAGGAAGGAAAATTCGTGTGAC  
GACCAAATTC AAGAAAATTTGTCCAAAGGATTTGTTAGGACTGATGATCCAAGCAGCAAGCACCAAGGAATT  
GAATTGGAATTCGAATTCCTCTTCTTCTTATTCTAAGGATTTGAATTCCTTCCACCAATCATCAAAGATCA  
CAGTCCATGACATTGCTGAGGAGTGCAAGAGCTTCTTTTTCGCTGGGGGACAAAACAACGTCGAATTTGCTG  
ACGTGGACGACAGTTTTGCTAGCTATGCACCCACAGTGGCAGGTCCAAGCACGTGAGGAGGTGTTTAAAGT  
TTGTGGACCACGTGACATAACCTCCAAAGATGATGTTGTTAAGCTTAAGACGCTGAGCATGATCATCAATG  
AAACCTACGATTATACCCGCCAACTGTGGCAACCATCAGACGAACAAAAGTTGATGTGGAAC TAGGGGGA  
CACAAGATCCCTCGTGGGATTGAGCTCTTGATACCGATCATAGCCGTCCATCATGATCAAGCATTATGGGG  
CAATGATGTAATAAGTTTTAACCCCGATCGATTCTCCGATGGGGTGGCCCGTGCTGCAAAGCATCCCGTGG  
CATTTATTCCATTTGGCCTTGGTGTTCGAACTTGCAATTGGACAAAACCTCGCTATTTTACAAGCGAAGCTA  
ACACTTGCTATCATACTGCAACGTTTCTCCTTTTCGCTTGGCCCCACATTATCGGCATGCACCAACGGTTCT  
TATGCTCCTTTACCACAAATATGGTGTCCAATCATTTTTTCGACGATTGGCCAATCCAACGGCACATCCAA  
ATCAAGAGCCCTAA

>M.japonica\_CYPb

ATGGAGGAGCTTTTGGCTATACTTGTGAAGCTAATGGCAATATCTTTCATAGTTTTGGTATGTTTCTTGAA  
GGTTTTGATCTTGTGGTGGAGGCCAAGGAAGATTGAAGAGCACTTCTCAAAGCAAGGCATTAGAGGGC  
CTCCTTATTGCTTATTCATAGGCAACGCTAAGGAGCTTTTGGGACTTATGTTGAAGGCTTCTTCTCAACCC  
ATGCCTAATTTCTCTCACAACATTTCCCTAGGGTCTCTCTTTCTACCATCATTGGAGGAAAATCTATGG  
TGCAACATTTCTAGTATGGTTCGGACCCACTGTCCGTCTCACCGTGTCTGATCCAGACCTCATTAGAGAAA  
TTTTCACTTCCAAATCAGAATTTTATGAGAAGAATGAAGCTCACCCACTAATTA AACAGCTTGAAGGTGAT  
GGCCTCCTTAGCCTCAAAGGGGAAAAATGGGCACAACATAGAAAAATCATAGCTCCAACCTTTTCATATGGA  
AAATCTCAAATTGCTGATACCGGGGGGGGCTCATAGGGGGATCGAAAAATTACCCGAAGGGTTGGCAATGG  
GGGATTTTGGGGAGGTGGAAATTGAAGTCCCAGAATGGTATAAATCATTAAACCGAAGAAATTTTTACCCGA  
ACAGCATTGGTGGTAGCTTTGAAGATGGAAAAGCTATTTTTCACTACAAGCCCAACAATTAGCCCTTGC  
TTCCGGGGCATTTC AAAAAGTTTTTCATCCCCGGCTATAGATTTTTTACCACAAAAGAGGAACATGAAATCCT  
GGAAATTGGATAAGGAAATCAAGAAATCCCTTGTGAAAGTCATCAATCGAAGGAAGGAAAATTCGTGTGAC  
GACCAAATTC AAGAAAATTTGTCCAAAGGATTTGTTAGGACTGATGATCCAAGCAGCAAGCACCAAGGAATT  
GAATTGGAATTCGAATTCCTCTTCTTCTTATTCTAAGGATTTGAATTCCTTCCACCAATCATCAAAGATCA  
CAGTCCATGACATTGCTGAGGAGTGCAAGAGCTTCTTTTTCGCTGGGGGACAAAACAACGTCGAATTTGCTG  
ACGTGGACGACAGTTTTGCTAGCTATGCACCCACAATGGCAGGAGCTGGCACGTGACGAGGTGCTTAGAGT  
GTGTGGGTCACGTGATGTGCCCTCCAAATATGACATTGCCAAGCTTAAGACGCTGAACATGATTATCAATG  
AAACTGAGACTTTACCCACCAATCGTGGCAACTATCAGACGGGCGAGAGCCGATGTGGAGCTGGGGGGA  
TGTAAGGTTCCGTGTGGGACCGAGCTTTTAATAACCAATCATAGCCGTCCATCATGATCAAGCCATTTGGGG  
CAATGATGTC AATGAGTTCAACCCCGCTCGATTCTCTGATGGGATGGCCCGAGCAGCGAAGCACCCCGTGG  
CATTGATTCATTTGGCCTTGGTGTTCGAACTTGCAATTGGACAAAACCTCGCTATTTTACAAGCGAAGCTA  
ACACTCGGATCATACTGCAACGTTTCTCCTTTTCGCTTGGCCCCACATTATCGGCATGCACCAACGGTTCT  
TATGCTCCTTTACC CGCAATATGGTGTCCAATCATTTTTTCGACGATTGGCCAATCCAACGGCACTTCCAA  
ATCAAGGGCCCTAA

**Genomic sequences of genes used for phylogenetic analysis in Figures 4d,e**  
Coding-sequence exons are shown in capital letters, introns and 5' and 3' non-coding regions in lower-case letters.

```
>M.indica_GLO1_genomic
aggagagaaagagagagaaaaaaaggagagATGGGGAGAGGAAAGATAGAGATAAAGAGAATAGAAAATCA
AAGCAACAGGCAGGTCACCTACACAAAGAGAAGAAATGGGATAATCAAAAAGGTTAAGGAGATCACTGTTC
TTTGTGATGCTAAGGTCTCTCTTGTTCATTTTTAGCAGCTCTGGTAAGATGGTTGACTACTGCAGCCCTAAT
TTTCCgtaagttgcacctttttttgttttaccttcttggttagattttttaattttttatttcatttaat
aattgatattttctgatataatctctttttttccaattattttgtgaagGTTGATTAACATCTTGATGC
ATATCAGAAGCAAAGTGGAGATAAGTTGTGGGATGCTAAGCATGAGGgtttttttttttttttttcttaaaac
aattttttttctctttttgtttgtttaagattctcattttttgtctgtctctgtagaaagtgcacatgaa
ttttgtcaaaaatgcaaaaggaactgaaatgattctatggacagatctacaaataggatgtagttc
cttagggttgattttattatgttttcttaatggaggacactaaaatctatatgagatggtacatccat
ggccagatctggttaacaaaaagctattctctctcctccttcttagctaaaactaagtaactagcactgggt
tcaatttctcaatgtatttcataatattttctttctagatctgtcaatcttttttaaggagagaatgaaacta
tctcttttacctggtttttttaagttaaaaatggtgcttttagtgaaaccaacataaaacttgttct
ctaggttttataggcagatcacaacattgtctctaggttttatggccagatctgcctattttattttcc
tatctttatttctagtgggtgatgatgaagtcactcttttttaagtaacgggtgggggctgctgtagcgata
aagattacagtgactagatttcaggcataacgtatgcatgtagggtaacattagaggaaattgaagctttg
aaattatttaaaacccttatgtatgtaatgggtattttgtttacttattttctcagAACCTCAGCAATGAAA
TTGATAGGATCAAGAAAGAGAATGACAACCTGCAGATTGAGCTCAGgtacacactcactctctttctctct
cactttctctctctcactcttatgtgaatgtatcagGCACTGAAAGGAGAAGACATACAATCTTTGCACCA
CAAAGAGCTCATGTCTATGGAAGAAGCCCTGGAAAATGGACTTGCTAGTATTTCGCGAAAAGACAGgtattag
tctaaaaagaaggcattttatttattgttacattggagtgactaggcggggaggaggaatcgaaattatgac
cttctagtacaaaagtgggttatggtctaaattccaatagctaatcatagtgggtgacagcatttatgtttg
cattggattaccatgagaaaagggaactctagtgggtataagacattagtgcacacataaaattattatca
tatactacgtatagtgttgacttaagaagtatgacccttaaaaatgttgctcgacgcggtgctcagacattt
atctgatgactggacaattgctcaaacgtacgtgactatttttcttagttatatttttaagatcggata
tacgattaatacttgaggcattagacacacatatcatgtttataaaaggacaaaattttatgacaatattc
aagaattttgtaaaagagaataatgaattattttctctcacttagatcaatggacaataactagaagtt
tcttaattccgaagagaaaacttattctttaatgtatcaatacatgatgtgacgaaaagtgtctgttaatt
taaccgataaaaataaatgattgttctattatgaaatgtaagtttgagaaatggaactaataattttttta
ttatttaacttctcatgtatattttctatactatttcagtaaaactgatatctacatagacatgttt
atcaaaacttatatgcatagacatgaaatgtataaattcgaatataatagccatgcccttaattttttgga
tcgttttatttcaatttcatgttctgttctgaccccgctgctatagaaatgttgactaatggacctata
atggcggcttatagcaaaaatctgtgcatcactagaaatgaaattagtcactaaacctctcatttattgt
agtagaactagcttataattttctggtacacaaaaattcagaaaggagagggagctaaacttagaattaa
tagtttcaaaatataattgtgtgaagtttcttcaattattattttttctgtgtcagagCGGAGATTTT
CAGGATAACAAAAGGAATgtaagtagagacgaagctcactttatttatactcttttttaagtttgacaat
catatattgcctcatgggtggttatacatttatctcgttactcaccacgtatacatatctatctttggaa
ctcacctaggtatagggtggtgatagggtggtttttgtagcttctgtttcttgggtggaccaagtagatcgt
cttttgactttgtgctcgggtgacttaggagtgggttgagattggaaaaggagagtggtattttgtgaggggt
gtgtttccgtaattttggattttgggggtggggaggggttgtaaaaataaagagaagttttggggtcattttg
taattttcagaatttaaggataatgccttgattatgcttaaaatggataaattagtgagaataaggggttc
aagagggaaattttttctcaccacttgcttggatcttttagttgaaatcatttttttaatgctccacacttg
gaaaaataatcgtacttttacaagtgaatgggtgatcattgaaatgagcaatgattgttttaagacat
taaacctagcttgaagagtagaaaacttttataatcactccatagtcaaaacacgacaaacctatgtttt
gtctacaagtcaataaatcattcacaataaactataatcaagtttttctaagaaatcaataaccattca
taagtcataactcaaaagataaaagaatgaagatattaaacttaataaaccaagatcattacaagaagtgg
ggcattagtattttctttctcaaatcctaaggaagtgtgcctccatactaggggtcatcctttttttggg
aaatagtagggctcatccaatctagagagaaggagagaacaaataacaaactacaactaaaagaatgaaac
tacagagaaaactaaagctaaaaagataatggacatctttcatatgaagaccagaggggttaataagaga
gagaattccatacatacaaaaatacctataacctaaccctcaataaaagtacacgaataaaagaaaaagaaa
aagaaattagatttgacttccaatcacacggaaggtgccatttatggcttgtaagaagtggaaggctttga
gacaaattgggagagtgctatcatgctttaggataattcttgaggggtaaaatcatccatgctttatttaa
ggtgaaagtgcgaagctttgagcaatggtttatccaagcttctgtgtgggcacagtgagttatagttaa
atthgtcaagcatcgctctgtcaaggtggatgccacgggttcaagccctatcagtcctaacaatccaa
```

taaatccatcaattcaactctcttttctgccaatgacgagatatggggctgggtaggatttcatttacaag  
aaaaggaggatTTTTTTTTTCTTTTATTCTTTTTCTTTTGCATTTCTCATCAAAACAAAAAATGAAA  
ATTTTCGATACTTCAACGAGAACCAATGATGGTATAAAAATACGCTGATTATTTCAACACATGTGGAT  
taatttaacgTTGGCAGCATTATATTTGGTGAGGATTTCTGACGAAAGAAGCATGAGAAAATGTATTCTC  
TGTAAATGTTTCTGTATGTTTTGGCAGCATGAGGATAAGGAAAGAATGCTGGAGGAGGAGTACAAGTGCC  
TTAGCTTGCAAATTGtatgtgctcatcaacacttctgtgcttttcaagttaattcgttactctggaataag  
taatcaagtatttatattatgtagacaatttcaccgaatattatcttttatgcataatctataatgTTTTA  
catgctaaatcgtaactcttaagaaataagtagtaataactatataatttatgtagaaatatcactgtacac  
ataattttgtatgaatatgtatatttgccaacctcgatatataagggacgattaattgctatttatcatc  
gataatcaataaggtgtagcaggaaccatccctaagTTTTAGAACTATAGTTAGGCCCTCAAGTTATGA  
TTCAAATAATGAACAAACCATAATATACAATCTGTATTCAAATCAAACCTGATCAAATTTTTAATT  
gaaattgttaaattgctaataaaaagattcttttgacatactctccataaaatcatttgaaaatatataaaa  
agaacataataaaaagactatgtattgacccttttatgataaatttcataagggttgatgaaatttctgg  
taaaaaaattttaaaatgaaatttatataatttatattaaaattagttgatcagctttaattttataactgt  
atatgaaggatatttatattacttgaatcaaacttgaagggttgaacggtaatttttttaaaatactag  
gattacattaccccaaacctaaggggttgaattgtaagttttattcttttttaaactgcaatttgcgtat  
cattacaaagttaatatctgaatgcatcatttgcaccccaaaaaaaaggaaaaagaagaacaaaatcgt  
atattcttacaatgagagaagaaatcacccaaaaaaaagttaaatattacttttgacctcaaacttccctt  
ttgtgtattttcttgtgatcccgcagcatcgccaattgggtgccttaggaacttatgtgtagtgttaggg  
ttggattatgtcatgcatatTTTTTTAATTATTAGTACATCAGAGCCGTAATAGAAAAAAGGAA  
agaataactcgaatccactatTTTTGTTGTGAGTTGTTTTAGTTGTAGAGGCGTTGTCTCTCTAGGG  
tgtgctcttgtcagtggtatctgctttatttgggtgtttatatttgatattaccagaaaaaaaactt  
gaattcactattgagaggacataagtaaggggtgtctttcaactaagctaacctcttttgtactagtcttt  
tgtctatataaacaataatgagattctaatttttcatatgaatgagatatatttttctcaataatttatac  
tctccttaacagATGGATATGGAGGGCGGTGGAAAGATGGAGAATGGGTATCATCAGCAGCAGCAACA  
AATGCAGATGGCGCTTTCTCCTTCAGGGTGCAGCCAATTCAGCCAACTTACATGAGCGATTTTAGcgt  
atacgactcccccttattttatatactcaaaactctctctctctct

>M.indica\_CYPa\_genomic

cataaaaccaagaagataaggagaagctatatagctcatatagcaaaggggtgctcccaaacacttccctta  
gctcaaggaaggaacatattaaccATGGAAGATCCCTTGTFTTCACTTGATGAAGCTAATGTTTATCTCTAT  
GATCGTTGTGGTTATTTTTATGAAAGTTGTGGTTTTCTTTGGTGGAGGCCAAGGAAAAATGAAGCCCATT  
TCTCTAAGCAAGGCATTAGAGGACCACCTTATAGGTTCTTTATTGGCAATACTAAGGAAATTTCTCAGCCTA  
ATGATGCAGGCTTCTTCTCAGCCATGCCTTTCTCTCAACAATTTCTCCCAAGGGTCTCTCCTTCTATCA  
TCATTGGAGAAAAATCTATGgtaactctctctctctctctctcatattttctaaaacttttgttttgaat  
ccttttgaacttggcgataggatactggggtcaactgtaaactcagacattgtagttcaattcctatctca  
cagtggtcgggcgcaactagtaccagtggtttgttgggtgcatgctagatagtggtcaaaaacttactttggg  
gggttgggtccaatgtatTTTTTTTTTCACTAGAGACATTGCTTGCCATGGAAAACTGTTTTGAAATGT  
tagttgggttgagcttgataaaatttcttcatcttttttaaattttcgtatatgggtagttctttgaga  
gatgatacataacttctattagtaaatacacttcaaatgactttagatacttttatcttcattattattaga  
tttacggtcaccatcttggcaaaatctaaaagtgagcatgcttcttttttatctgttttttttagtttca  
tcttcttcttatagcattcatgacttgaagatcttttcagcttattccctgtttgggttcttcaattaaa  
ctcttatctttacctcttcatcttctctgtccttttttttatttctttttttttgttccccctttct  
tctttttgtctcccctaaactctcatccaaacgctatccattaaaaaaaactctttctgtctatcacggta  
agaattttgtatttatcttgtctaataatcattatgccttgtagatgtgctcattgtactttcacaatcag  
tctatgaaagatgctctgaattttcagcaacagagtggtggagttttcattcccttttcttgatttcgtat  
tcattcttttaggtatgtgggggctttagtgatgggtaacttatatggggggttgatagtggtataccct  
ttgaattgtcttttctctctccctcacattggagtagtgtctgccccttctttcattttcatcactctttt  
tttttttttttaccacttcaactttgctaactaaaattctatgccactatgggtcctttccccttctttaa  
ttttcataggaattaatcactcccaatacacgctctctttatgttatttgtgacatttttattgtgattct  
cgaccatagGTGCCACATTTCTAGTGTGGTTTTGGACCCACGGTCCGTCTTACCGTCTCCGATCCAGACCTG  
ATTTCGAGAAATTTCACTTCAAAAATCTGAGTGTATGAGAAGAATGAGGCTCACCCACTAATCAAACAAT  
TGAAGGAGATGGATTGCTTAGCCTCAAAGGAGAAAAATGGGCACACCATAGAAAAATCATCACTCCTACCT  
TCCATATGGAAAAATCTCAAAgtaagttcacaataaatgtcaccctctttgtttataatttcttttcttttc  
tgggtaagaaaaacacttggagccatttgacatatttctttaaagttaaattacaccaccaacccttaag  
gttttgggataatgtaaggtatcaccttcaagtttttaaaattacagctagatcactatcaaatacctaa  
attttctgtaaatatattatcttgatcataaattttatgaaatttaagtaaaacttaccaaaatatcatga  
acgaggttataaattcccactttttgtttatttttttaaagctttcatagaaattatgggtgagataatc  
tttttcagggtcgggttaatatatttcatattttaaatttaattactagctctaattttggaataaacatga

agagattttattaaaatttaccttttcttttatataaaaaaacacttttagccatttgacattttctttt  
tctttattacagtagatagacattttctcatttaattggctactaattttataactagagttgttataatat  
ttttttcttttttatagTTGTTGATACCGGTGGCTTCCAAAAATGTGTTGGAAATGTTGGATAAATGGATG  
GAGATAGGTAATCCGGGGAGGAAGTAGAAGTGAAGTCTCTGAGTGGTACAAAATGTTGACAGAAGATAT  
AATTACCAGAATGACATTTGGTAGTAGCTACGACCAAGGCAAGGCTATTTTCCGACTACAAGTGAACAAT  
TGGCACTAGCTTCTGAGGCATTTCAAAAAGTCTTCATTCTGGATTTAGgtagtccttttccagttaaaat  
atacaagaacttcctaacaacgaatcgaatcgaagttcaatttatagttttaacaaattgaactccagctcc  
aaaataatcagttcgataagattttgaactgacctatcagctcgggataaaacttagtagagtgaaagtaaat  
atataatctatataacattaacattcaataaatttatatatgtgtatagtttttatttttcattaattta  
tatctatatcttaaattatttattaattcataaatttaaattatttgatttacaagcttttaagaaaaaac  
tcattcaagccaaactcaagcttaaatttgaaggtcaagccttctatttccagctcgagtcaagctcaaat  
cagtaaaagttcagctcaaattgacttgggtgcggatccattatccaccataattactaactgattctcta  
atttttgaaatcttagATTCTTCCCACGAAAAGGAACATGAAATCTTGGAAATTGGACAAGGAAATCAACA  
AATCTCTAGTGAATCTTATCGATCGGAGGAGAGAGAATTCATTCAAAGGAATTCAGAACATGGGCCTAAG  
GATTTATTAGGGCTTATGATTGAAGCAAACAAGAGATCGTTGGAATTCATTCTCGCCATCCTCAAACAT  
CACGGTCCATGACATCGCCGAGGAATGCAAGAGCTTCTTTTCGCGGGCGGCCAAACGACTTCCAATTTGC  
TGACGTGGACGACAGTTTTGCTAGCTATGCACCCACAATGGCAGGAGCTGGCACGTGACGAGGTGCTTAGA  
GTGTGTGGGTACGCTGATGTGCCCTCCAAAGATGACATTGCCAAGCTTAAGACGgtaagctagcctagctc  
acattattaggacaaaattcaatatttgccttttctttgtgtcctgttctgaattagcataaagtataaa  
cccctgagtcctttgttcggttcaaatttttataaaaaatcataaataaataataggtagaacctggtat  
catcaatcagccatgaatgtacaatttggataatgagggacaaaacgataagaaatctcttttgaggaga  
acaaaataaacttttttaatttgaagtgcttagtgcactgttacgttcaaaaataacctgaagttata  
gggagtaattgaaattacaaaaagtattgtggatcatgaccactgcatccctcagctgccactgtttcag  
aagaaaaacaagtgggtgttatgaatttgtgtatgtaacaaatagccattgataaatagaatgtaatttg  
tctttaaaaaataggaatttgcgttcttgaaaatttgaaaatgacaattttgtattttagagtttcattt  
atgtttttttttttgtgctgcatgcagCTGAACATGATTATCAATGAAACACTGAGACTTTACCCACCAAT  
CGTGGCAACTATCAGACGGGCGAGAGCCGATGTGGAGCTCGGGGGATGTAAGGTTCCGTGTGGGACCGAGC  
TTTTAATACCAATCATAGCCGTCCATCATGATCAAGGCATTTGGGGCAATGATGTCAATGAGTTCAACCC  
GATCGATTCTCTGATGGGATGGCCCGAGCAGCGAAGCACCCCTACGGCCCTAATTCCATTGGGCTCGGGGC  
CCGAACCTTGCAATGGACAAAATCTAGCAATCCTGCAAGCGAAGCTAACGTTTCGCTATCATACTACAACGTT  
TTTGCTTTTCGCTTGGCCCCGCAATATCAACACGCACCAACGGTTCTAATGCTCCTTTACCCCTAACACGGT  
GCACCGATCATCTTTCGACATTTGGCAGATCCCCACAGTTGAtcgtcagggatgcttaagctctatagtc  
attta

>M.indica\_CYPb\_genomic

gcttggctcaagaagaaagcagagtttttttttttattgatagagcaaaagttgagagaagaacaaccATGGA  
GGAGCTTTTGCTATACTTGTGAAGCTAATGGCAATATCTTTCATAGTTTTGGTATGTTTCTGAAGGTTT  
TGATCTTGTGGTGGAGGCCAAGGAAGATTGAAGAGCACTTCTCAAAGCAAGGCATTAGAGGGCCTCCT  
TATTGCTTATTCATAGGCAACGCTAAGGAGCTTTTGGGACTTATGTTGAAGGCTTCTTCTCAACCCATGCC  
TAATTTCTCTCACAACTTCTCCCTAGGGTCTCTCTTTCTACCATCATTGGAGGAAAACTATGgtaaca  
tctctctctctctccccccagcctctctctctctctctctctctctctctctctctctctctctctctct  
tttgtttaacaaattatcatggaaataagttcctatatttgggttctctctctcataagagacttacttgatg  
ttctatttgagttcttgatgtttaacttccatagctcttatctcttttccatcttttctctctattttttt  
ccttagttcatcccttttgttcatttgggttagagacccttattcttctagtcagcaaatatcatatc  
agatgtacagtcctcgtctccgtctactgaaagcttaattccagattcctagaatgtaattttcttgttcaa  
taattatataatataaccttttctatataatataatataacatttagtacctttaattgacataacataa  
cctatctttataaattagaataatttagttactaatatttccataatcaatcttttttttccgataagctttc  
cgatcaagctaagtcaaaagataaattgattttcactacgtgcacatagagttttcctatttttgttact  
actaaagtatttttttctaaattatctctctctctctctctctctctctctctctctctctctctctctc  
tcacagccattgtaaggtctacatctgtaataattaatgctgttgaatcagtggtctcctgttcccttct  
gagcatctattatccaacatgacacttctaatttgaagcgccatggaattccctacatggtgcaatgactc  
catctccttgaaattttacctacaacttacaatttcaattatctcttctcttaattttaaagcacttaaat  
tggtgttagattaatgtctgtggcgcttaactacagGTGCAACATTTCTAGTATGGTTCGGACCCACTGTG  
CGTCTCACCGTGTCCGATCCAGACCTCATTAGAGAAATTTCACTTCCAAATCACAAATTTTATGAGAAGAA  
TGAAGCTCACCCACTAATTAACAGCTTGAAGGTGATGGCCTCCTTAGCCCTCAAAGGGGAAAAATGGGCAC  
AACATAGAAAAATCATAGCTCCAACCTTTTCATATGGAAAAATCTCAAAgtaagttcaaagttttattttaca  
aaaaataatccaaccttttatacttgaagccatttccagaattatacataaatacccattttagaaaaaaa  
aaatctaattttttatatttggcataatcttttagTTGCTTATACCGGTGGCGGCTCATAGTGTGATCGA  
AAAATTACACGAAGCGTTGGCAATGGCGGATTCTGGGGAGGTGGAAATTGAAGTACAGAATGGTATAAAT

CATTAACAGAAGAAATTATTATTCGAACAGCATTGGTAGTAGCTATGAAGATGGAAAAGCTATTTTTCAA  
CTACAAGCACAACAATTAGCCCTGCATCCGAGGCATTTCAAAAAGTTTTTCATCCAGGCTATAGgtaa  
catcgcaaattttgtacttataattttgtcttctccattttataaattaaaaaagtaaaaactaatat  
aatctgaaacccatgggtttttcttattttctttttttttttcacacataaacataatctctgctc  
caacattccgcacctaattggtcctaagatatacaaaaatttggtcaatcaacattgccttttgcc  
catttgtaacctacttttattactatagctctcaaaaaatacagagaaaaactggtgcat  
gaaactcctaagtggtttctgacctattacgtaattgatgcttgagtcttgatacattattctg  
aacctcctaagtgataaaactacaataaaagagacttttagcgacaacattgatattgtgacgaa  
tgtcaaaaagttggttactataggtccaacataaaaataaaattgtgataacaattcttttata  
cactaccttggttacgaaatgtaatttgagtatcaaaaattcttatcatgagagtaataatag  
tcatgaagatagtagtgacaactgtaatgacaatgcaatttgccactaaaactccatttcctta  
tttagttgttacaaggacctcgaaaactaattggtttttttttttatcatactattttgggtg  
TTTTACCCACAAAGAGGAACATGAAATCCTGGAAATTGGATAAGGAAATCAAGAAATCCCTAGT  
ATCAATAGAAGGAAGGAAAATTTCGTGTGACGACCAAATTCAAGAAAATTGTCCAAAGGATTTG  
GATGATCCAAGCAGCAAGCACCAAGGAATTGAATTGGAATTCGAATTCCTCTTCTTATTCTA  
TGAATTCCTTCCACCAATCATCAAAGATCACAGTCCATGACATTGCTGAGGAGTGCAAGAGCT  
GCTGGGGGACAAACAACGTCGAATTTGCTGACGTGGACGACAGTTTTGCTAGCTATGCACCC  
GGTCCAAGCACGTGAGGAGGTGTTAAAGTTTGTGGACCACGTGACATACCCTCCAAAGATG  
AGCTTAAGACGgtaaggtgacattattacaagattgatcatgcttttccggctctgctggtc  
cattatacccctatctatggagattacatatatctttttggacactatcttatgaaaatta  
ttgtttttcccataaagggcaaaaatattaaaacaattctattgctggtatgtggaggtttat  
gagaacagtaatagttctcacgaaaatattattctttcagaatcttttgtatataattat  
aatgtggtattttgtacattgtaattgtgatacataaaaatgggtacatgacatttaccttag  
gacagacacatattatgtactaagatgatgtaccctgcaaatttgtcatttacaaggaaatgat  
ctctgtttttgcaatgaatatgaatgaacacattctattgtagcttgagttgactgaaaaat  
aaaatctgtatatgtatatatatatgacaattaattttgaaaatattccttctgattggcc  
aatcctttcaaggtagaaaaaataagggaagggtatgcagttatgccgttttggaaat  
tggtattatgattttggtttgcagCTGAGCATGATCATCAATGAAACCCCTACGATTATACCCG  
GCAACCATCAGACGAACAAAAGTTGATGTGGAAGTAGGGGGACACAAGATCCCTCGTGGG  
GATGACTCTTGATACCGATCATAGCCGTCCATCATGATCAAGCATTATGGGGCAATGATG  
GATAAATAAGTTTAAACCCCGATC  
GATTCTCCGATGGGGTGGCCCGTGTGCAAAGCATCCCGTGGCATTATTCCATTTGGCCTT  
ACTTGCTATCATACTGCAACGTTTCTC  
CTTTGCTCCTTTACCCACAATATGGTGCTC  
CAATCATTTTCGACGATTGGCCAATCCAACGGCACATCCAAATCAAGAGCCCTAAaatt  
aagcaatcaatacctatcctttgtttgtgagtgcatacatactatttttcctttctgcat

>M.japonica\_CYPb\_genomic

tcggaaggctcgagtttttcagcaagatggctcaagaagaaagcgacctttttttttgttattgatagag  
caaaagttgagagaagaacaaccATGGAGGAGCTTTTGCTATACTTGTGAAGCTAATGGCAATATCTTTC  
ATAGTTTGGTATGTTTCTTGAAGGTTTTGATCTTGTGTTTGGTGGAGGCCAAGGAAGATTGAAGAGCACTT  
CTCAAAGCAAGGCATTAGAGGGCCTCCTTATTGCTTATTCATAGGCAACGCTAAGGAGCTTTTGGGACTTA  
TGTTGAAGGCTTCTTCTCAACCCATGCCTAATTTCTCTCACAACTTCTCCCTAGGGTCTCTCTTTCTAC  
CATCATTTGGAGGAAAATCTATGgtaacatctctctctctctccccccccctctctcttaaaaatctacttt  
ccaaagttttttcttctcttctgtttttgttttaacaaattatcatggaaataagttgctat  
ctttctcataagagacttacttgatggtctatgttgaagttcttgatggttaactccatagctctt  
ttccatcttttctctattttttttctttagttcatcctttctgtttttgttcat  
cctttattcttctagtcagaaaaatcatatcagatgtacagctctcgtctccgtctactgaaagctta  
tccagattccccagcatgtaattttctgttcaagccctgaattacctacaatcttacaatttcattatctc  
ttccttaatttcaatgcaccttaaatgttggtagattaatgtctgtggcgcttaactacagGTGCAACAT  
TTCTAGTATGGTTCGGACCCACTGTCCGTCTACCCGTGTCTGATCCAGACCTCATTAGAGAAATTTTCACT  
TCCAAATCAGAATTTTATGAGAAGAATGAAGCTCACCCACTAATTAACAGCTTGAAGGTGATGGCCTCCT  
TAGCCTCAAAGGGGAAAAATGGGCACAACATAGAAAAATCATAGCTCCAACCTTTCATATGGAAAATCTCA  
AAgtaagttcaaagttttattttacaaaaaataatccaaccattatacgtaaagcccatttcagaatta  
tacataaatcccatttttagattttttttttgattttttatattttggcataatttttttagTTGCTGATA  
CCGGGGGGGCTCATAGGGGGATCGAAAAATTACCCGAAGGGTTGGCAATGGGGGATTTGGGGAGGTGGA  
AATTGAAGTCCCAGAATGGTTTAAATCATTAAACGAAGAAATTTTACCCGAACAGCATTGGTGGTAGCT  
TTGAAGATGGAAAAGCTATTTTCAACTACAAGCCCAACAATTAGCCCTTGCTTCCGGGGCATTTCAAAA  
GTTTTTCATCCCCGGCTATAGgtaa



taggctacaatgacaattagacttctcccaaccattcactatggcctaatttaatttttccttgatatatt  
caaccagaatattatttttctacttacttctttcattgactcttgaaaaataaatttttagttataagtt  
attttccaataaaaaccaccttataatttagagcaacatatataatcttcttgactaacgaaattagaac  
caagtggagacaaaaatctaaagcggttttcatttttgaaaagcaattaatgcctcttggaagcatgtag  
gggtgtttggtatggaccctgtcgcctgtttttcaattcttatcctttttgggtttgggttttataccttt  
ttcaaaaaatattaatgtagtcggtgtttgttataaattagtcaaataaaatttttgacataatctcaact  
ccttatctcccattacgtttttttggagattttttccgttttaggttaagtattgctttaaaaaatcgaa  
ggtataattaacttttttttaatttttaaccaattaatcactcaacacattcattgattttgaaatatt  
ttataaaaaggtaatatggaaaaatcacactgtctcgttatattatcgaggccatttaagggtttcttaa  
ttttatggcaatctctaaaaacgtcacttaatatgaaacaaagggagtatagaggactaagccaaatattt  
ggtagggaactataacaatcttataaatttggaaaaaactcactttagtgtattaattaatttatttttt  
tttagtctccataataattttttctgtcctccttcggcattttccattttcgattcctgggtggatagtta  
gcaaaagagatatttaggctacttatcaciaaaatatagataaaattcttacatctctaaaaatgtaacata  
catgctctaagattgatgcttctgtcaaattttataaataaacactagcatgtataggaatttgttatta  
tttgctaattatccaatctgaagctacttatttttgtgggtgtttgtaaaaaggctaagctgtatataata  
gcaccctatgaagctgcatgtgggtgttatgtttctttgtctattttccttttttttgcaagtcgaattt  
caactatttggattgtgtgtctatttagctagtctagcttcttttttaagggttctcatctttgtcaccatt  
taagttataacaacctctcattttgttatacaaaacaaacaagttaaaaagagaacgggtttgaaaagaaa  
tttattcattttacaaaagaaaaaaattgtttttccgtagcattttctaggtggagaaaatttatttgcg  
tttattttatgcataatttgtcgcctaacttgcagctcgtcaataatagatataacgatttgtttcaaaa  
atggtgaaattaaccacacagtgtagcagcagttgcaaaaaatttttagtgactattttgggtttattactaatt  
aaaatttcataacaaaaccttcaaattcatcacattcatgcagtttcatgtaacattaatggatgtaaa  
tatttcataatataactagtcataaagctcctctgataattcttatatggctaggcacttaaaaaagttt  
gaatttaaattatgcagGGACAACATTTCTAGTGTGGTTCCGGACCAACGGCTCGTCTCACGATATCTGATC  
CGGTCCATAATCCGAGAGGTTTTGATAGTAAAATCAGAATTATTTGAGAAAACGGAGTCACCCCCACATGTT  
CGGAAGCTTGAAGGTGATGGACTGCTTACGCTCAAAGGAGAGAAAATGGGCTCACCCACAGAAAAATAATCAC  
TCCATCCTTCTACATGGATAATCTCAAGgttagttgttaataatattgtattatagcaaatgccatattt  
ttaaaaaattcatactccaaactggtgcaagtttttacaagttacgactaaacaactcaagagaaatggaa  
ttttgtgatgaactttatcgtatctcgttaacatcattagggcagacaacatttagttcatcagtgagtgta  
attacttagtgacaaaagggcttgtctgattgcagtagtttttaagctcaagttttctttaaataatatt  
tttaaaccataaccatttagtgttcaattgaaatgatgaggtccaaaaagaacttttcttgcaactatagg  
taccattcatgtaaatcacccaatttttaatacaatcctttttctttctttctttctttctttctttatct  
ctttcttttttttttaacaatttcatcaacactcccaatttcatcaatcctctatttccacactcccac  
ttttttcaacaatattacttaagtgcacatcttatttttttttttttttttttttttttttttttagCTCATGATGC  
CCATAATGGGAAAGAGCATGGAGAAGATGTTGGAGAAAATGGGTAGAAAATTTCTAAAAGTGGGAGTGTGGAA  
ATAGAGGTTTACATTGGTTCCAAGGTTTGGCAGAGGAGATTATTACCCACACTGTATTGGGAGTAGCTA  
TCAACAAGGAAAATCTATATTTGAGTTACATTCACAAAAAATGATACATGCTATTGGCTCTTACAACAAGG  
TCTTCTTCCCGGATATAGgtaaaaaaaaaacttttagattaaatgcaatataatataatataatagcttatt  
ctctactcacctacacttgaaaaccattttttgtttgttttataagtaaatatttatcaattaaatagtt  
ttattgtgtaaccactaagtaagtttttagacatttatcatgaatttaagtccggtttgtgaaaaaaagatat  
tttctcaaggataccccaccttggaaggtatacctcctcgcattggatagaaattaatgtcaacttaaat  
gtttcataaatttgagaaaaagcacactttttggattgagaaaaatgaaaaaatttttaattgcccgtaaaat  
ataattttaccagtgtaaaaactgcgggatgggaagtaatgcatgattgtaatacaggatagatgtcctat  
tgctaattgacgaagtataattccacgtagcaactaaaaatttattgggataaatgcaaaaattcgatatt  
gtaactgatatgatataaccacccaagcagatgaatttatccatcctgctaacattcgttgaccaata  
aaagcactagcttttttagtattcttcatattttgtctggcaattgagactagtaatctgaacacttactgc  
tttaccacactgggtcaataaaataatcaagttttatttaatttctatacatatgcaacattctaaaataag  
gattttacatgtaggatttctatagtaggtcaacgtggcaccgcacattgcggaagtatgtatgccacact  
aagtacaagataatatacctagatgcatgtacaaaactataattttttttttttttttttttataattacgagat  
catgctccacgcttattaattttattttttatagcaatttaataattaattttgtttcttttttaagGTTTC  
CTCCCTACTAAAAGAATAGACAATCTTGAAACTGGATAGAGAAAATCGAAAAATCCTTGACCAAGCTCAT  
AGACAATCGGATCAAGGCTTACAATGTCAACCAATCGATCGCTTCCGATAACTGCCGAACGATTTATTGG  
AATTCATGTTCAAAGCCAACATAAAAAACGAGACACAACAACCTGCTTCTAATTCTTATTATTTCGTCCTCG  
GCGCCATCAGTGATTACGACCCACGATATCATCGAGGAGTGCAAAAACCATCTTCTTGGCCGGGAACACAC  
CACGTGCGCCCTGATGACGTGGACCCTGTGTTACTAGCGATGCACCCTCAATGGCAGGAACCTGCACGCG  
AAGAGGTGCTGACGGTGTGCGGGCACGTGACGTACCCACTAAGGATGATGTGGCTAAACTTAAGACGgta  
tgacatttttcaatcttttattttcacaatatacgtgtaaatatttggttaggaataatagtcacggtaattg  
atcactagtcataattgttgtcctgtgaccaacatacacatttatcttttagcacacttgtgattatgta





aacattttgtttgacagtttctaagaataactaaggtctaataactcgataactggagttcaattctga  
taatgaaataagatttgcattgcatgggggaagggatgtaggcttcaagttcaggcggctttactttg  
ctggcggattatgccgaatctgactaacagtctagtgtttgatttgtttactttatataacttgcagTTT  
GCTGATAAGGAAATGATTCTCGAAAATGAGAACAAGCGTCTTAACACCAATTGgtatgtcctcgtccatt  
atthgtttcctacgttagttttgtcagataattctatcatcagctcatgccgtaaggtgtttgggtaagt  
cccgtactaccctttttggaagaaactattcgagaacagatggaaatcttttttcacaaaaaatacttc  
caagacttaccactcattgacaagacaaagatttcgggtttcagtgtagcaactcattgacttcttttttc  
ggaggattagcaactcattgactgtcaccctcacttcaaagtttatgcacaataaattttcactagaaact  
gtatatgataatagtgaaggaaaaattagtttagtactacattgtaatccatagcaaattacaactattat  
caggtgtggcaatttataatttaattttcatacggatacgatatacggaaatttttgacaaacgacaaata  
atgatcaatattatccgatgaaggaaattgatcaacaatcaatattcaaatttgcacctctgattttggaa  
gcgaccgtgaatattgtagctgtttatthgttactatccttagattttcaatttctaattaattacctt  
ttaaaaaaaaaataaaaaattgcagCACCACCAATGATGGATATGGAAGGTGGAGAAATGGAAAATGAG  
TATCATTACCAGACTCAGGTGCCAATTTCTCCTTCCGTGTGCAACCAATTCAGCCAAATTTACATGGGCA  
AGTTTAAattagaccgaataatttgttgcagtggttagtataattatgtaatatgcgtcctttgataatgt  
attgtgtctgggtactttgtgagggcgcttaatcccctcaataatcagtagtataatctccaagaatt  
nnnnnnnnnnnnnnnnnnnnnnnnnnnnnnnnnnnnnnnnnnnnnnnnnnnnnnnnnnnnnnnnnnnn  
nnnnnnnnnnnnnnnnnnnnnnnnnnnnnnnnnnnnnnnnnnnnnnnnnnnnnnnnnnnnnnnnnnnn

>E.ribes\_GLOy\_genomic

nnnnnnnnnnnnnnnnnnnnnnnnnnnnnnnnnnnnnnnnnnnnnnnnnnnnnnnnnnnnnnnnnnnn  
nnnnnnnnnnnnnnnnnnnnnnnnnnnnnnnnnnnnnnnnnnnnnnnnnnnnnnnnnnnnnnnnnnnn  
aacaacatcaagaagaagaagaagaagggagagagagagatATGGGGAGAGGTAAGATAGAAATAAAGAGG  
ATTGAGAACTCAAATAATAGGCAGGTGACTTATTCAAAGAGGAGAAATGGGATAATTAAGGCTAAAGA  
GATATCAGTTCTTTGTGATGCTCAGGTCTCCCTTGTAATCTTTGCTAGCTCTGGTAAGATGCATGAATATG  
TCAGCCCTAATTCGTCgtaagatccgatactttttcttcttttttttttaattttttcttattt  
ttttattaattttattatgaattgtatgaatctttccgcttattgagttattattatttcgaaagttgttc  
taaactctggatccatgcataagcactagtcgctcgtgtttttctacttttttgccaaaaaacttgaaga  
tctgaatcaaaaaacatctttgtagcctttatataatttgtgtgaacaactacagttcaagaatcatcac  
aaactttttgttaactcatggtctagctaatctcccttttaataacttaatacaaaatttattttgtgtta  
atthtaagatattgaaatagttacaggatctthtaataaaaattattgttgtgttagTTGATTAAACATCT  
TGGATGCATACCAGAAGCAATCTGGGACTAGGTTGTGGGATGCTAAGCATGAGgttttgtctaataatcttt  
tatttattttttattatataatattttttgtgattagggttttataatttattgcatatttttgccctt  
gaggaattctaggttatgtacaaggtggcataatthgttaaaaatgctatggaacttgaatgtgatt  
tctatggacagatctacaaatgggatgttgtgcttcttattatctctcttttttaaaaatttttaatact  
cacagacactaaatthttatgaggtgttacatccatggccagatctagtaaaaaataattcttattctctct  
cctctttgtttgcaaaaatctaggtagaatccaagttgtgtttcaaaaaaataattattttatttagatta  
gatctatcaagaactccccttctttttgggaactatctcctttacatggttttttcatgtaacattttgag  
tctttagtcaaaaacataaacaagcatggtcccttagccggatctgcctatttataaaatcatggtcaa  
atacttttagtgatctttctaatttaatttttaattggctttctaataagacaattttgtttcaagaat  
caaatatataattagaaaaaattcacataaaactttctataaaatctttttgaaattattggaataattta  
atcatttaacataaattgaaaaatataatataatagtttagctaaatttaataaaggttttatagattaa  
taaaaaacctattthtaataagagaattataaacttacatttctcctgagatttttagaaaatctaagaac  
aaaaaaactacgtgcaacatttcgctgcaagatttctcaaatgaaaaattaaatgagaaaaatcttgata  
ttcaaaagattggatgtatgctctaataatthgttagtttagtgatttgaatgatttttaaaacaaa  
caacaatttacagAACCTCAGCAATGAAATTGAAAGGATCAAGAAAGAGAATGACAACATGCAAATTGAGC  
TCAGgtacaattcattctctcttttctcagttctgattagaaaaagatattcacactccctctgctatgta  
atthcctcagGCACTTGAAAGGAGAAGACATAAATTTCTTGCACCACAAGGAGCTCATGTCATGGAAGAT  
GCCCTGAAAATGGACTCACTTGCATTCGCGAGAGACAGgtcaggaccatacagttgcaagtttaaatgtt  
taaaaaaaatttaaaaagggttagtaataattcttttgaaatataattctttgttccaatgttttcgctg  
caattccaaggtattcatggtgtagatataacatttctcgtatgtaagattctcggatacgttacactta  
tatatttgataaatgaagatggctttataactthtaaaatcccagaaactaacatgtgattttcatttac  
taccttgtttgtgtatcagATGGAGATTTACAGGATGGCCAAGAAAAATgtaagtataaaaaatgcaaaaa  
tagttcatagttgatggtttgttgcactatcggtttgaaattgtaaaatgtttaagcttaattattttact  
ataactaatttaaaaactcgtttttgcacaaactattgtttcaacattttcagacctttgcaaaacttatt  
tattactataattctthtaaaagccccgtttacatgttttaaatcaggttccaaagaacactacaaaaaat  
ggcctatagcaacgtttttcaagtgcattttttgcaaacgtcgttaaggtactagaaataattttttgc  
aatgtttctagtgcattttttgtcaaacgttgtcatacacagatttttacgacatttttaatagacatttt  
tgacaaatgttaccatgaactacattaatgcgatgtttttgttgacatttttttaaaatgttgtcattcac



caagaacaacatgaagaaaagataggaatattttatggtaaattgacgataacgattccagaattccgaatc  
cggagttataactccgaacgggcaagatttccctcccggaaaggtcggatttagctccagaatgaaactctt  
tcccatactccttttgctgtgtagatttgggtgaaataatataatggaatcaattttggtatagattaaaatt  
gatccaaccaccatgatacttattccatgtcaaatggaaaaattacattttgatccttgagggtttcaaaat  
ttttttgggtggttcctatagtttttagggcattacacttaatgtaatgattaagattctttacaacttaaa  
actactcattcgcttttcaacaccttaaaaaggatggttttaataaaaacaatgataccaacacatgag  
aatgatatgcttcgcctatgcatgagaatgttatacttcacaataaacatgataattatgctatacaagat  
aatgaaatcaattatcatggttagaaatacttcatacaactatgccaatcaactatacaacaagatgtatc  
aatcatgtcatcaaacgacctgcatttcaagtttataattagagttcatagtcctccgtacctcaaccgtac  
taaattgaaactcttgagaagctaagcctaaaatcctaaaattttcaccgcttgagccttagatttgatcta  
gtaacgcccttcaaataggaatgaaatctagaggtaaaaaacaatctctacgaaatgaggagcaagataaaca  
aatttattttttatggtcccgaaagactgaaaaacaaggaaacgagaaatcaacaagatagaaagttaaact  
taagccaaatgatagccttcacaatggagattccaaatatgtgattatcaacaatcttcaagctagatga  
aatcaagagaagaagattgaagtccacaaaactccaccacacccttctttctaaatttcggtgaaaagaa  
aggggaattaagtgtgacacttattatgtgatatttagttaaaaaatactttttccacacttaaatgtacg  
gagacctgtccagcgacctatagtcgactgtccggcgacagacacctttggacatcctattgggtcacagga  
aaattcttcgaaaattttcaaaaatttggctccaaaacacaaccctggaaccatttctcgtgacctgtc  
cagcggctcaacaatcggacatggcatcggacgcaacaatttctgccaactttgactaaatgccatacat  
cactcttgtatataaaaaatacataataagtactacgcatctgcaatgtactccgcaataactacgcccgc  
gctacaataccatactatgccatacgcacaactcaataataatattataatgcattaataatattatta  
ttaaaaaaaactcatttgaatttataagatattacaaataaaccttcacatcaaaagattaagaataa  
tacacatccaaaaataaattggaacaacatattgaagaaaaatagaacaataaaaaattaataggctgtgta  
gatagaaaaaatgtccaattttatgaaatcagatgatatacaaaaaacaacaacatgatctagaaattttg  
agagaaccaagtagttcatatataatataatataatagggcatgactataatgctagaatatttaagtcttc  
caaaactagttaaaatttactacttattattctaaaacttgcttatcatcattatagaaaatgaaaatttt  
gtattaataccataattttaagtctggttttcaaaagcttacttctcattggttatttatgcttttctatt  
ttttaaaaatttacttcttgttttctcaaaatttactaaccactgtaatttttaagaaaacaagtcaatc  
ttaggatttaaatgaaacaaaataaaaagtttatgcaacttttaatcatttatataaaaaatttgagcatggg  
tcggaaaaataaaaagattttaatagaggattattctcattattacatacaaaatattaacgccttaaata  
gttagctgttttgtgggagagtgaccagagaatctaaaatcataaggggattttatgcaaaaaataacca  
taagggatttttgtgcatattttaaaaccacgggtgggtgtcatggtgatatctccccaaaactccgctta  
cacttgaattttgagtcatttctcctacaaaagcaactcagggtctaaggctcgtctaataacttgctccgg  
agccttgcttccgaatataactaatttaagctatgcatttgctattaggggaaggtagtgtagactttgaa  
gctctaggggcatatgtttcacaatatcatgcttatgactaatagttcatccgagccatttcaaacccaag  
tgataaattagatgtgctatggatagaattcacttctcgttgttgagtcctttggacaggtatctcaaagt  
aaatactcaacaattttatcaatctaattgtgtaactgaccgttcgggaattagtagtctatttcttaata  
atgtcttctatataatcatacgggcccgttctaaacattgagactttaaggattcaatggttagaggaaatgaa  
attagtacatctccaatccatgatataaatgggagctctatttttagttcttttttcttctgtaaaccagga  
tgaggatagaggttaagtgttgatgtttgggtgtgactaaaaacctcttaaatcatcccataattttcaag  
aagttgtggccaaatctcctctttaaagatcacttacgccttttttttcccagcttataagttctaaact  
tccaatttgttttctttaaagattgatatctttgggtgtcatttttaagctgagcttttttgtctgttag  
gcgtaaatatactttagcatccaacattgttttagacaaaaatacagatgacttatttgttgaaaaccaca  
atgaaacatacccttagccttagtgacacttaaccaatccaaaaagaaaaaaatagcctcatttgtttt  
taagccttcaagagttgggtttacaattgattttatgtgtgtgtgtagattatgttttttaattgacaca  
gcaatgaaagccaccagtatactgtttgtaataatttttatccaatttaatgtggaaatataatctaaatcta  
acgctcatacaactgttctctattttccatgatattacaaattttagagtttatcaaccaattatttacatg  
tgaccaagtgttttttctactcaaatacatgggaccaagtgtttttcaactcaaataatagggaccaag  
tgtgctatgtattaatttttagtattctatcaatgtttctgcagTTTGCTGATAAGGAAAGGATACTGGAAG  
GTGAGAACAAGCGCCTTAGTTACCAAATGgtatgccttcattcacactcttatttgtgttctatgttaatt  
tgtagttctaaaaagtagtatataatacgtttaaatttaggtcaaaaactaaattaataatcaatatctaa  
ttaattccaaccatgaaaagtgggcccttcattgttgcgggatagtcgacctatagaaaaataatagagtag  
aaccaattatcgggttcaaaaatcgcgaaaaggccttagccacacacacacacacacacacacacacacacac  
tgataaacaagtcaattgaagagaaggaagcaacaagttcaccaggaaaaacaaaactggttcatcccaaga  
ttacttttaactagattttatgtcataattaacctcttgcctcactgaaatccgagaaaatttccctccgac  
aatgaaaaccaagaataccctctcggactttcttcttctcatctaggaatttttttctcttcaaacctctc  
aaaaacgccacgatattttgcaaaaatttcatagaatgcaagagaagtagatctaaacaaaccggatttgat  
ccaacctcccaatagtttaagcaaagattttgacacatcattcgtgcgcaagttctagttcttcaatcattt  
gogatccatgcctccacataatacaacatttctcgtgatgacctactttattggaacaataaaaacttct



**IGV screenshots of back-mapped reads to the assembled gene models.**

In the gene models below, coding-sequence exons are indicated by wide boxes, introns by the narrow line.

*E. ribes* CYP734A51

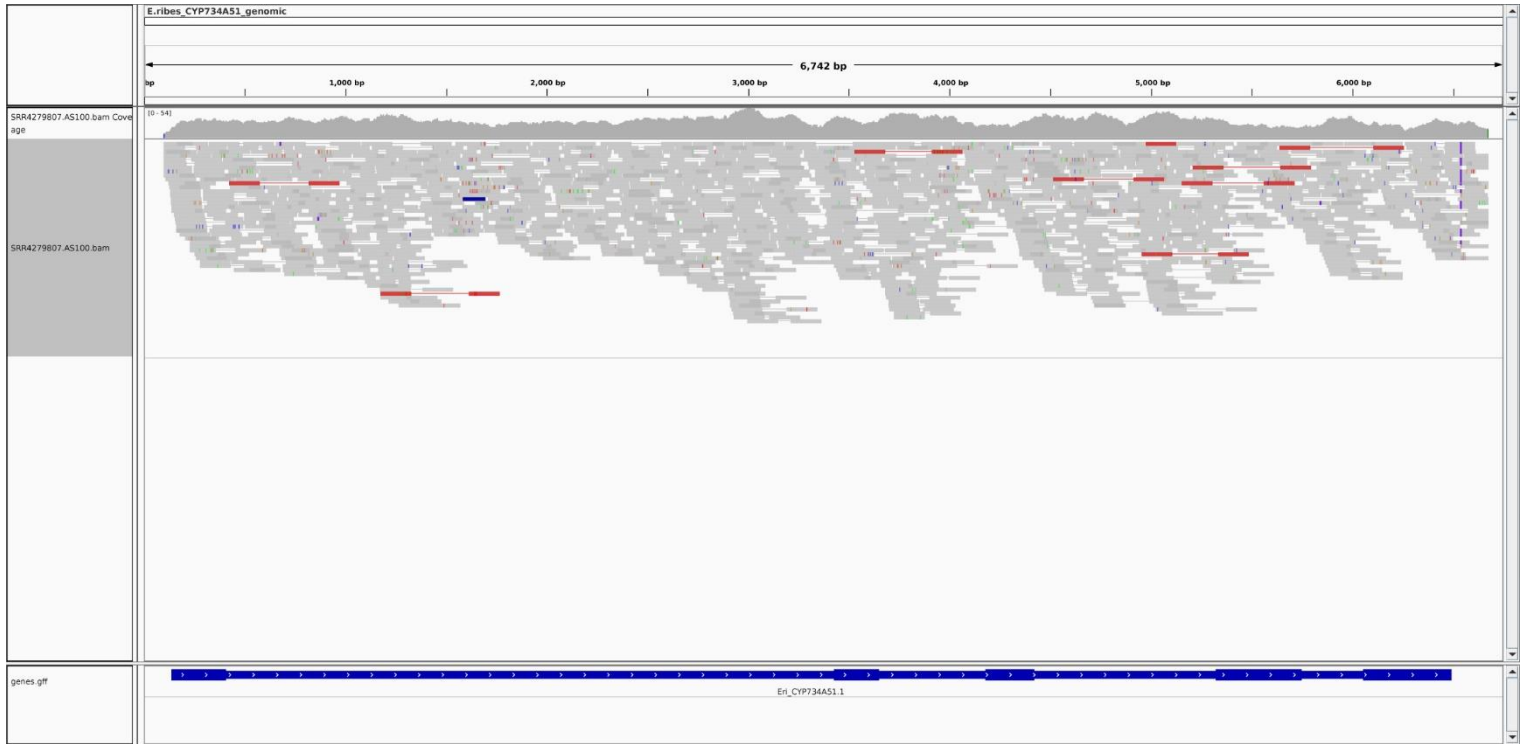

*E. ribes* GLOx

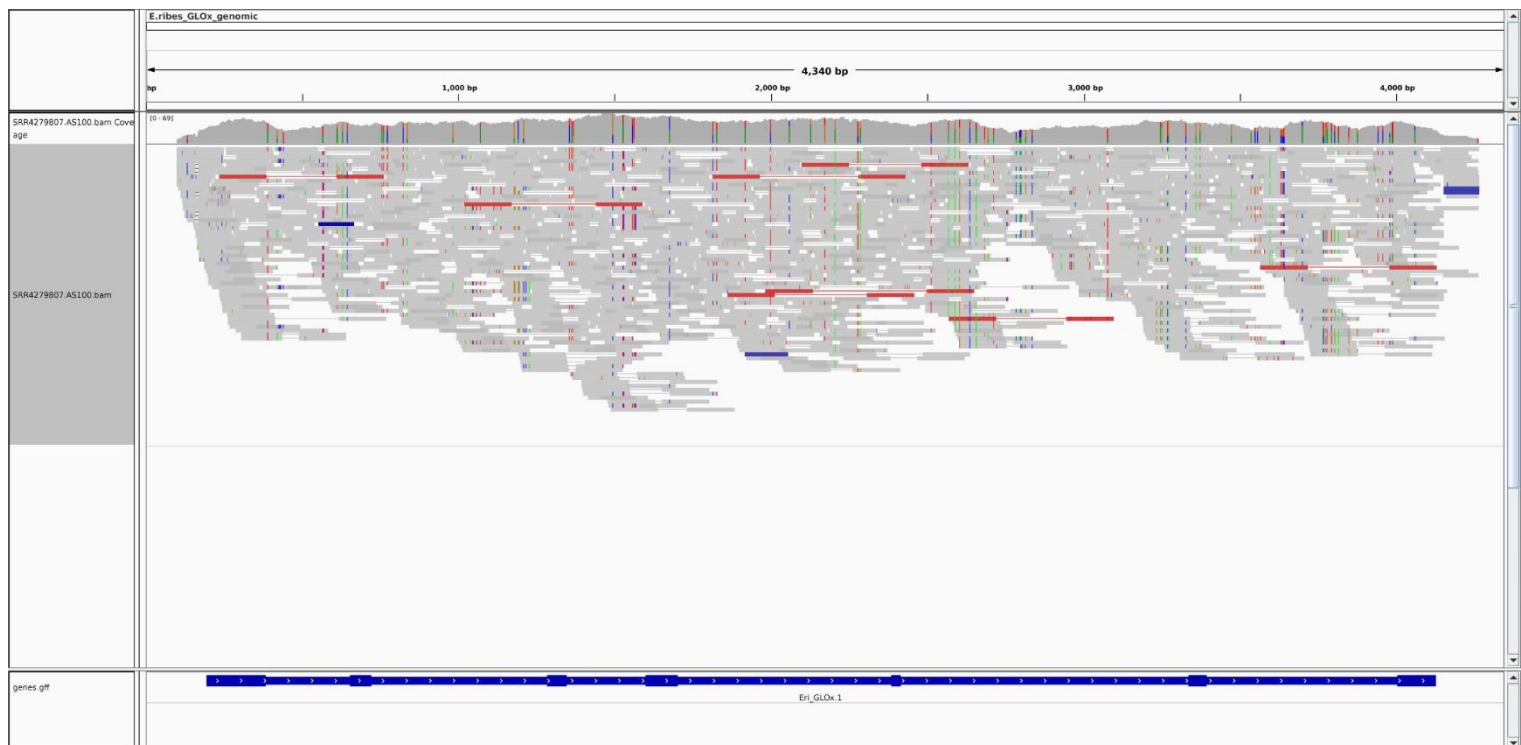

*E. ribes* GLOy

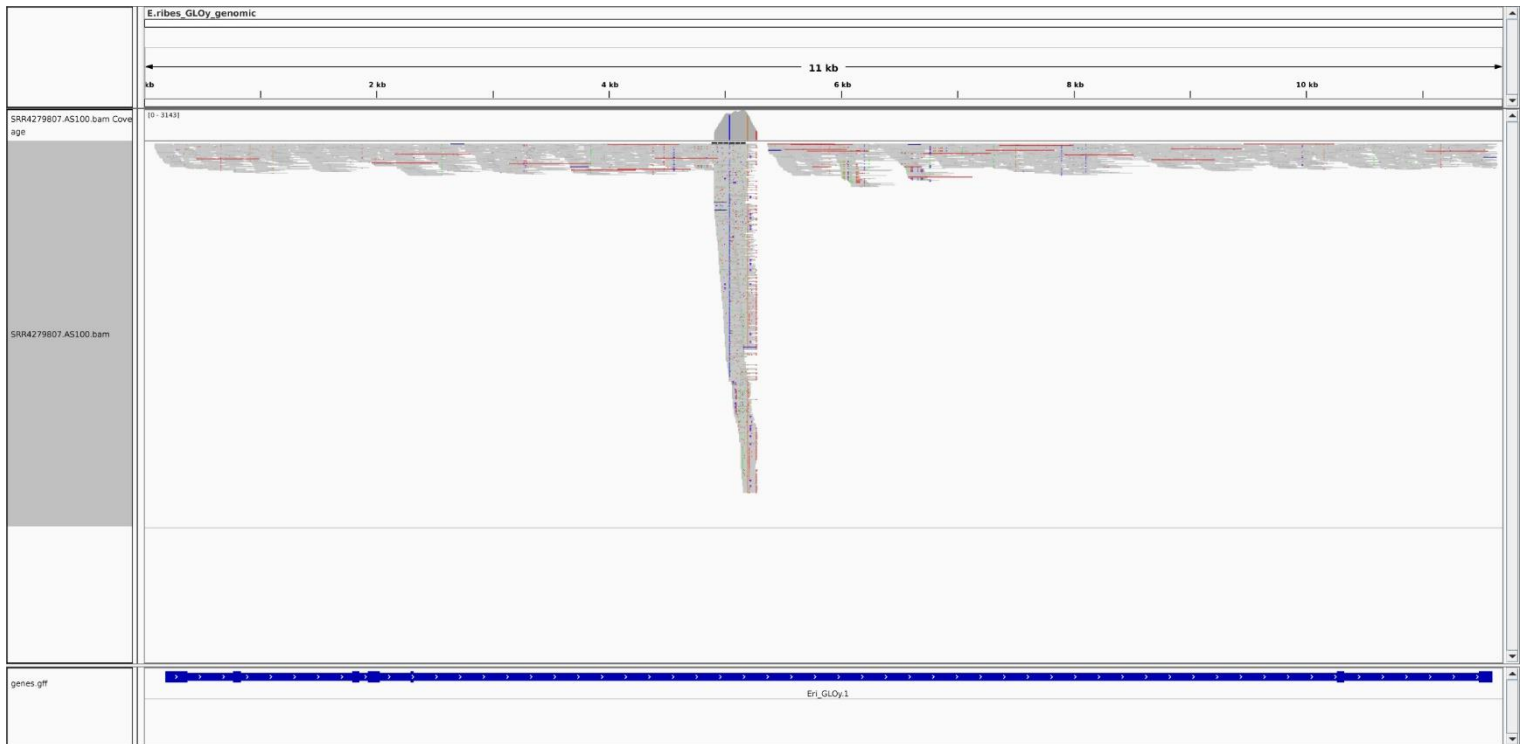

*E. sessiliflora* CYP734A51 (reads mapped against *E. ribes* CYP734A51)

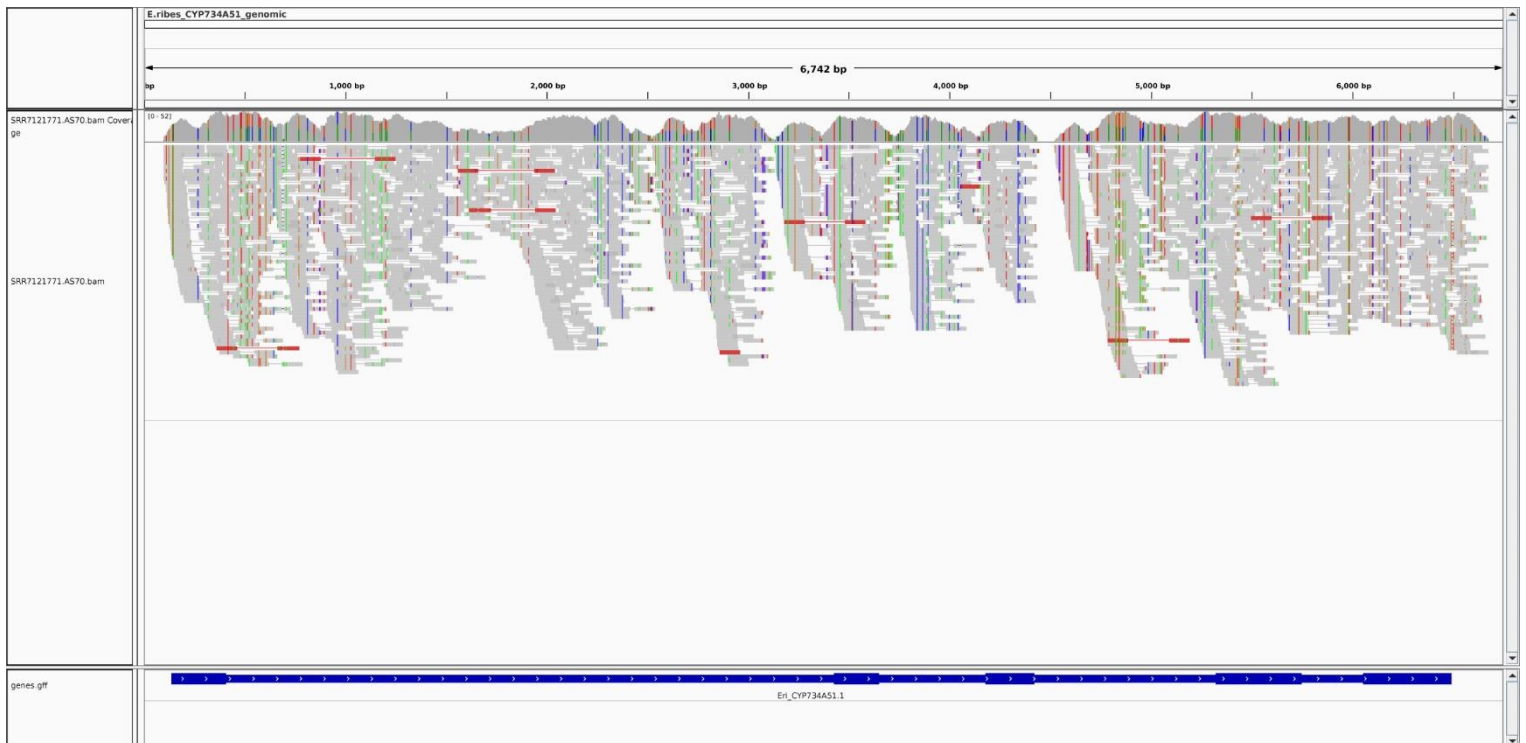

*E. sessiliflora* GLOx (reads mapped against *E. ribes* GLOx)

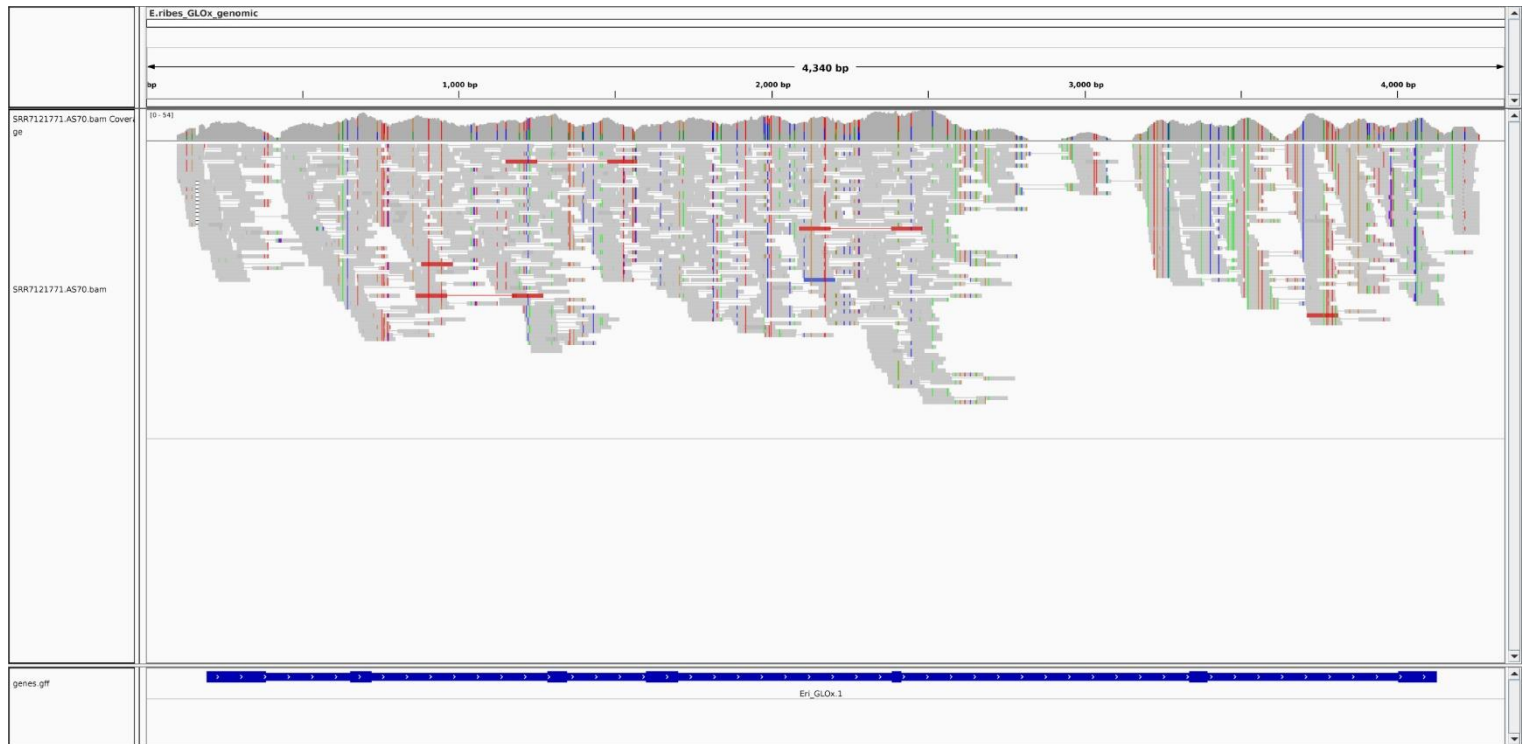

*E. sessiliflora* GLOy (reads mapped against *E. ribes* GLOy)

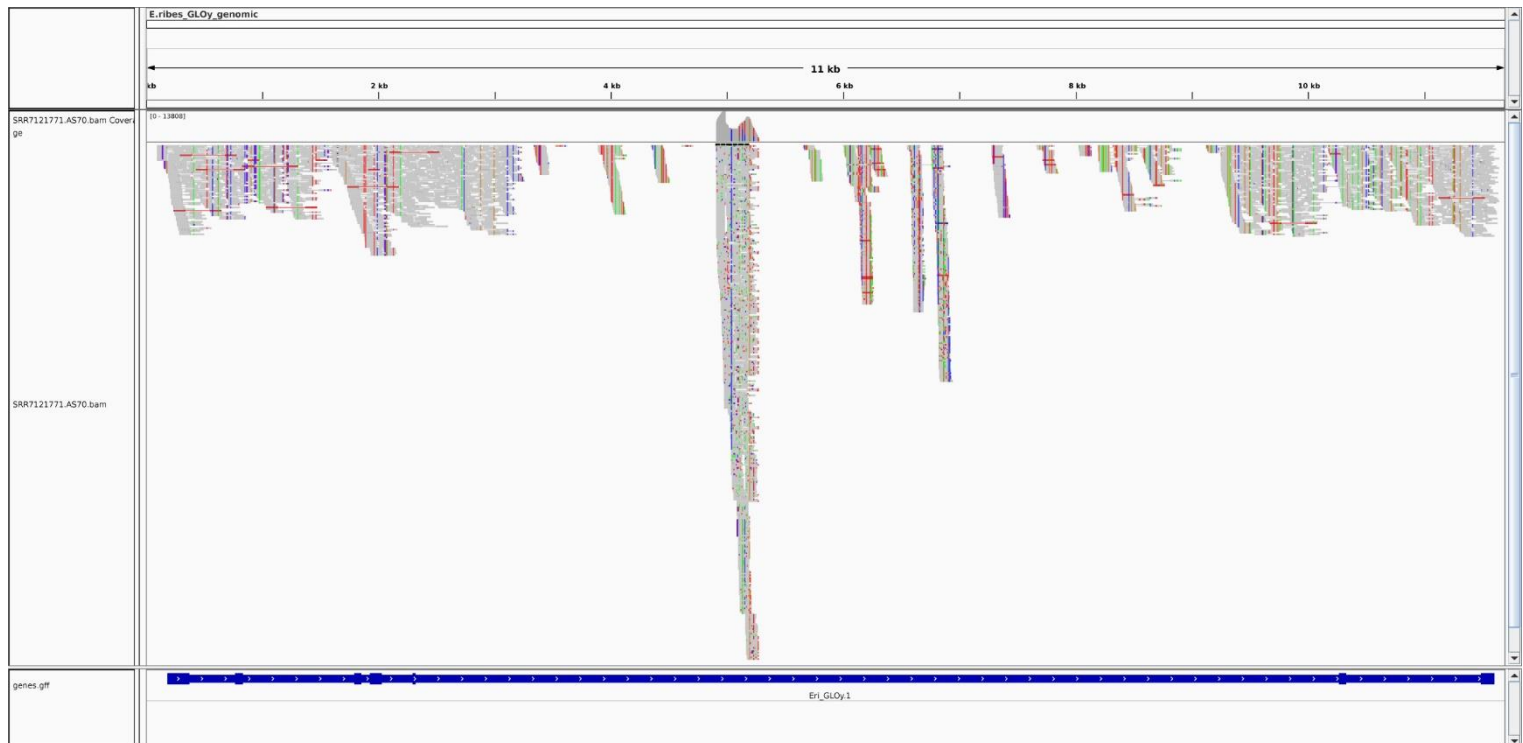

*M. indica* CYPa

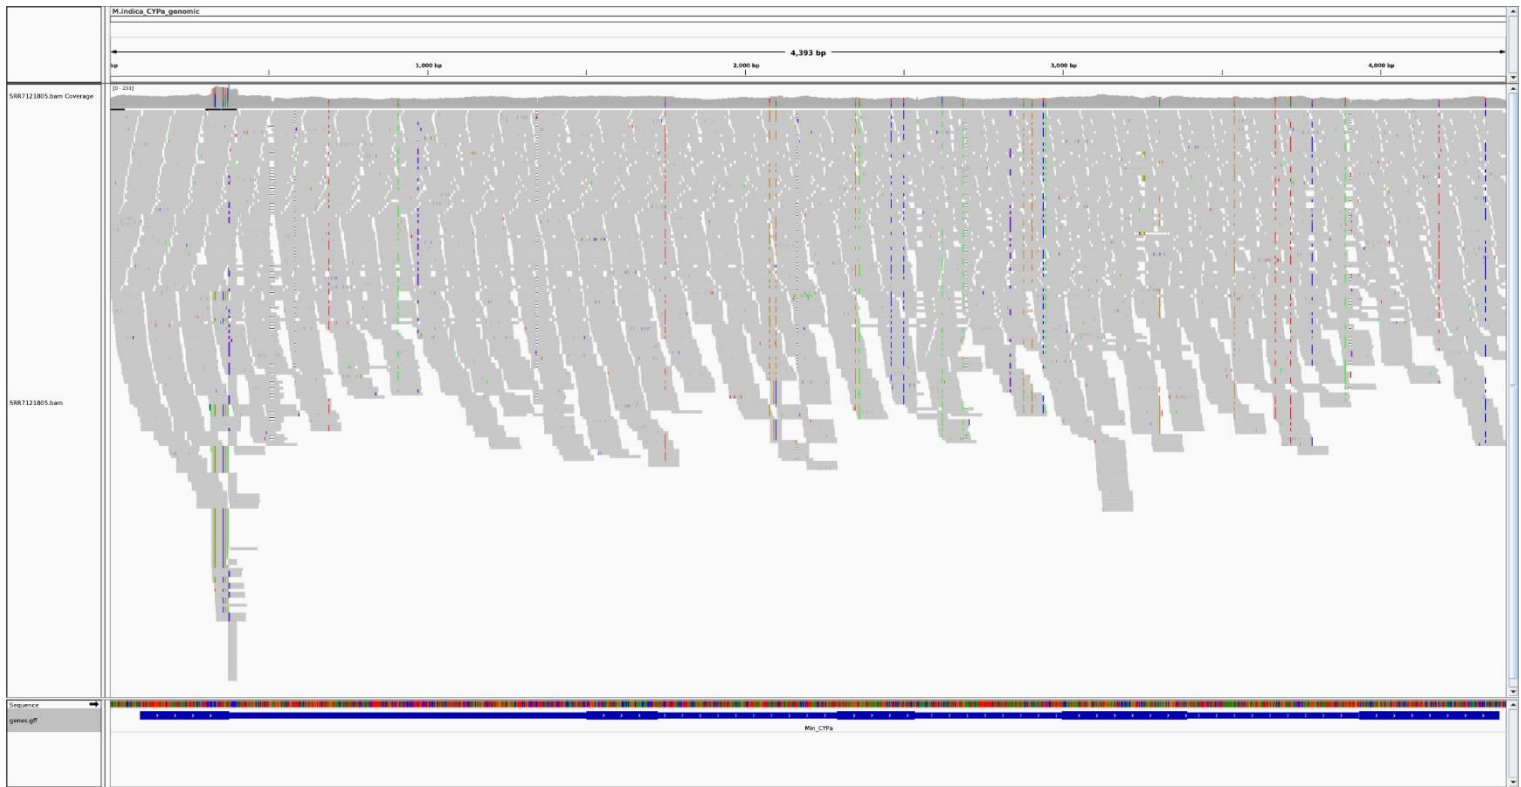

*M. indica* CYPb

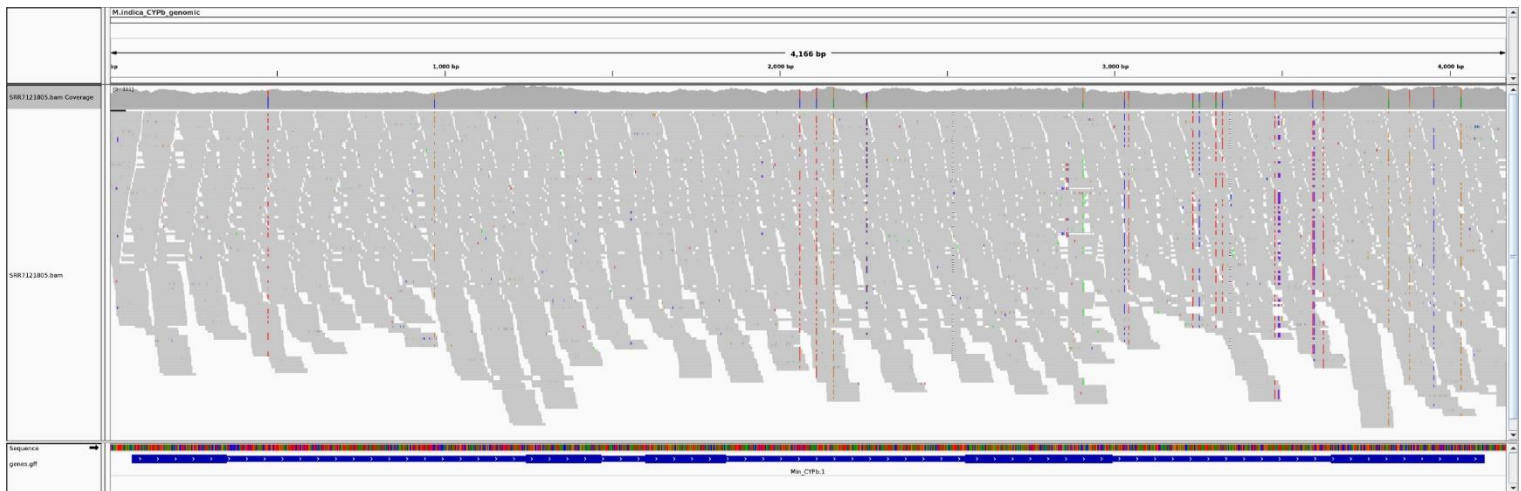



*M. indica* GLO1

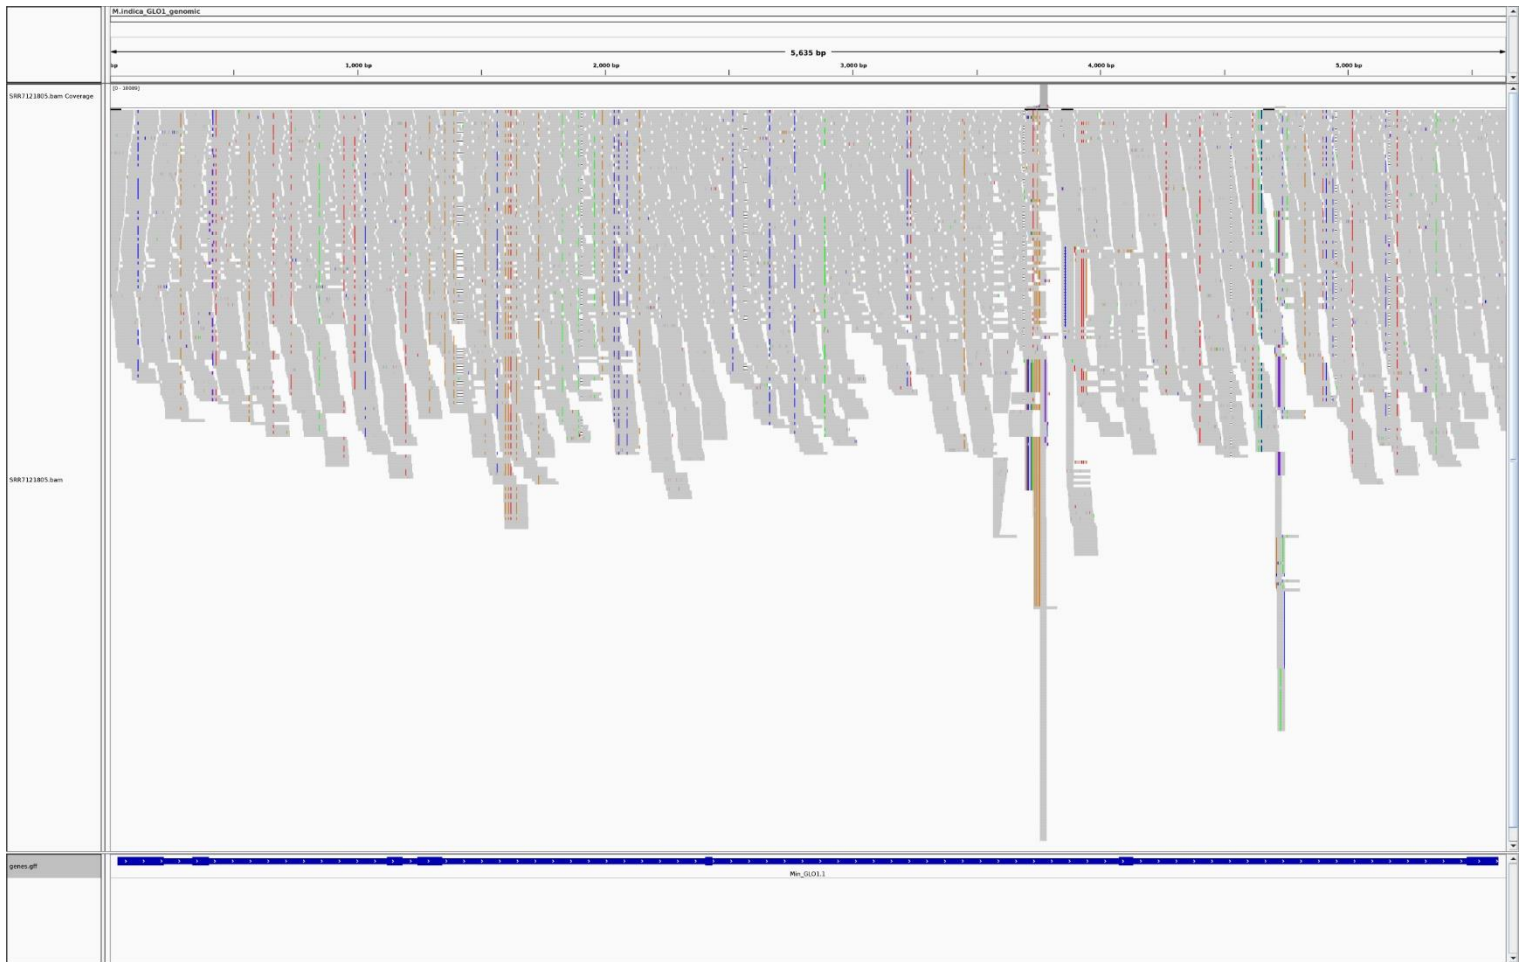

Supplement: pnas.2006296117.sd01.pdf [file pnas.2006296117.sd01.pdf]
