# Supplementary material
Source: PubMed Central journal article supplement (PMC7502755)
Supplement: pnas.2006296117.sapp.pdf [file pnas.2006296117.sapp.pdf]

Supplementary Information for

**Supergene evolution via step-wise duplications and neofunctionalization of a floral-organ identity gene**

Cuong Nguyen Huu<sup>1</sup>, Barbara Keller<sup>2</sup>, Elena Conti<sup>2</sup>, Christian Kappel<sup>1</sup>, Michael Lenhard<sup>1,\*</sup>

Michael Lenhard

Email: [michael.lenhard@uni-potsdam.de](mailto:michael.lenhard@uni-potsdam.de)

**This PDF file includes:**

Figures S1 to S5  
Tables S1 to S4  
Legend for Dataset S1  
SI References

**Other supplementary materials for this manuscript include the following:**

Dataset S1

|         |     |                                                     |     |
|---------|-----|-----------------------------------------------------|-----|
| PfoGLO2 | 1   | ATGGGAAGAGGAAAGGTAGAGATAAAGAGGATTGAGAACTCTAATATTAG  | 50  |
|         |     |                                                     |     |
| PfGLO1  | 1   | ATGGGAAGAGGAAAGGTAGAGATAAAGAGGATTGAGAACTCTAATATTAG  | 50  |
| PfoGLO2 | 51  | GCAGGTGACTTATTCAAATAGGAGAAATGGAATAATCAAAAAGGCTAAGG  | 100 |
|         |     |                                                     |     |
| PfGLO1  | 51  | GCAGGTGACTTATTCAAAGAGGAGAAATGGGATTATAAAAAAGCAAAAG   | 100 |
| PfoGLO2 | 101 | AGATATCAGTTTTGTGTGATGCTCAGGTTTCTCTTCTAATTTTCGCTAGC  | 150 |
|         |     |                                                     |     |
| PfGLO1  | 101 | AGATCGCAGTTTTGTGTGATGCTCAGGTTTCTCTTCTTATTTTTGCTAGC  | 150 |
| PfoGLO2 | 151 | TCTGGTAAGATGCATGACTACTGCAGTCCTAATTCCTCGTTAATTAATAT  | 200 |
|         |     |                                                     |     |
| PfGLO1  | 151 | TCTGGTAAGATGCATGAATATTGCAGCCCTAAATCTCCGTTGATTAACAT  | 200 |
| PfoGLO2 | 201 | CTTGGATGCATACCAGAAGCAATCTGGGACTAGGTTGTGGGAGGCTAAGC  | 250 |
|         |     |                                                     |     |
| PfGLO1  | 201 | CTTGGATGCATATCAGAAGCAATCTGGGAATAGGTTGTGGGATGCTAAGC  | 250 |
| PfoGLO2 | 251 | ATGAGAACCTTAGCAATGAAATTGAGAGGATAAAGAAAGAAAATGACAAC  | 300 |
|         |     |                                                     |     |
| PfGLO1  | 251 | ATGAGAACCTCAGCAATGAAATTGAAAGGATCAAGAAAGAGAATGATAAT  | 300 |
| PfoGLO2 | 301 | ATGCAAATTGAGCTCAGATACTTCAAAGGAGAAGATATAACAATCTTTGCA | 350 |
|         |     |                                                     |     |
| PfGLO1  | 301 | ATGCAAATTGAGCTCAGGCACCTGAAAGGAGAAGATATAACAATCTTTGCA | 350 |
| PfoGLO2 | 351 | CCACAAGGAGCTCATGTCTATAGAGAACGCACCTGAAAATGGAGTTACCC  | 400 |
|         |     |                                                     |     |
| PfGLO1  | 351 | CCATAAGGAGCTTATGTCAATTAGAAGGTGCCCTCGAAAATGGACTCACTT | 400 |
| PfoGLO2 | 401 | GTGTCCGCCAGAGACAAATGGAGATCTACATGATGGCCAAAAAATTTCT   | 450 |
|         |     |                                                     |     |
| PfGLO1  | 401 | GTGTTCGCGATAGACAGATGGAGATTTACAGGATGGCGAAAGAAAATTTT  | 450 |
| PfoGLO2 | 451 | GCTGAAAAGAGAGGATTCTAGAAGATGAGAACAACCGCCTTAATTGCAA   | 500 |
|         |     |                                                     |     |
| PfGLO1  | 451 | GCTTACAAGGAAAGGATTATGGAAGATGAGAATAGAAGCCTTAGTTATCA  | 500 |
| PfoGLO2 | 501 | AATTCA-----AGAA-----GCGATGGA-----T                  | 519 |
|         |     |                                                     |     |
| PfGLO1  | 501 | AATGCACCACCAAGTTATGGATATAGAAAGCGGGGAGATGGAAAATGATT  | 550 |
| PfoGLO2 | 520 | AT-----GCAGATGCCCTTGCTCCTACCGTGTACAACCAATTCAG       | 558 |
|         |     |                                                     |     |
| PfGLO1  | 551 | ATCAATACCAGCCTCAAATGCCTTTCTCATTCCGTGTGCAACCAATTCAG  | 600 |
| PfoGLO2 | 559 | CCAAATTTACATGATCGCTTTTAA                            | 582 |
|         |     |                                                     |     |
| PfGLO1  | 601 | CCAAATTTACATGATCGCTTTTAA                            | 624 |

**Fig. S1. Nucleotide alignment of *PfoGLO1* and *PfoGLO2***

The alignment was created using Needle (EMBOSS) with default settings. The regions used for VIGS are highlighted in yellow.

a

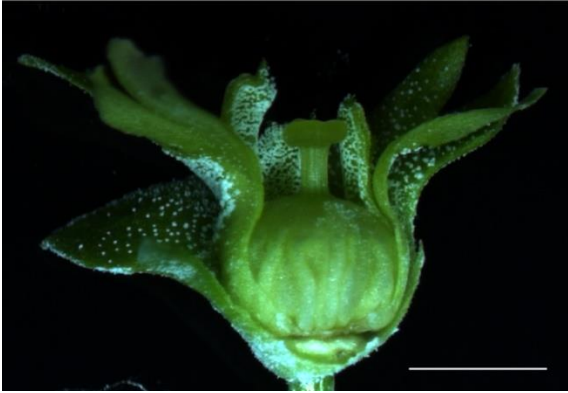

b

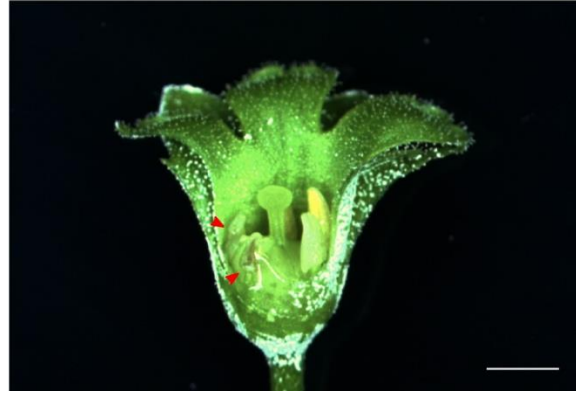

**Fig. S2. Silencing of *GLO1* expression**

(a,b) In strongly affected flowers of VIGS-*GLO1* treated plants, stamens show signs of homoeotic conversion to carpels.

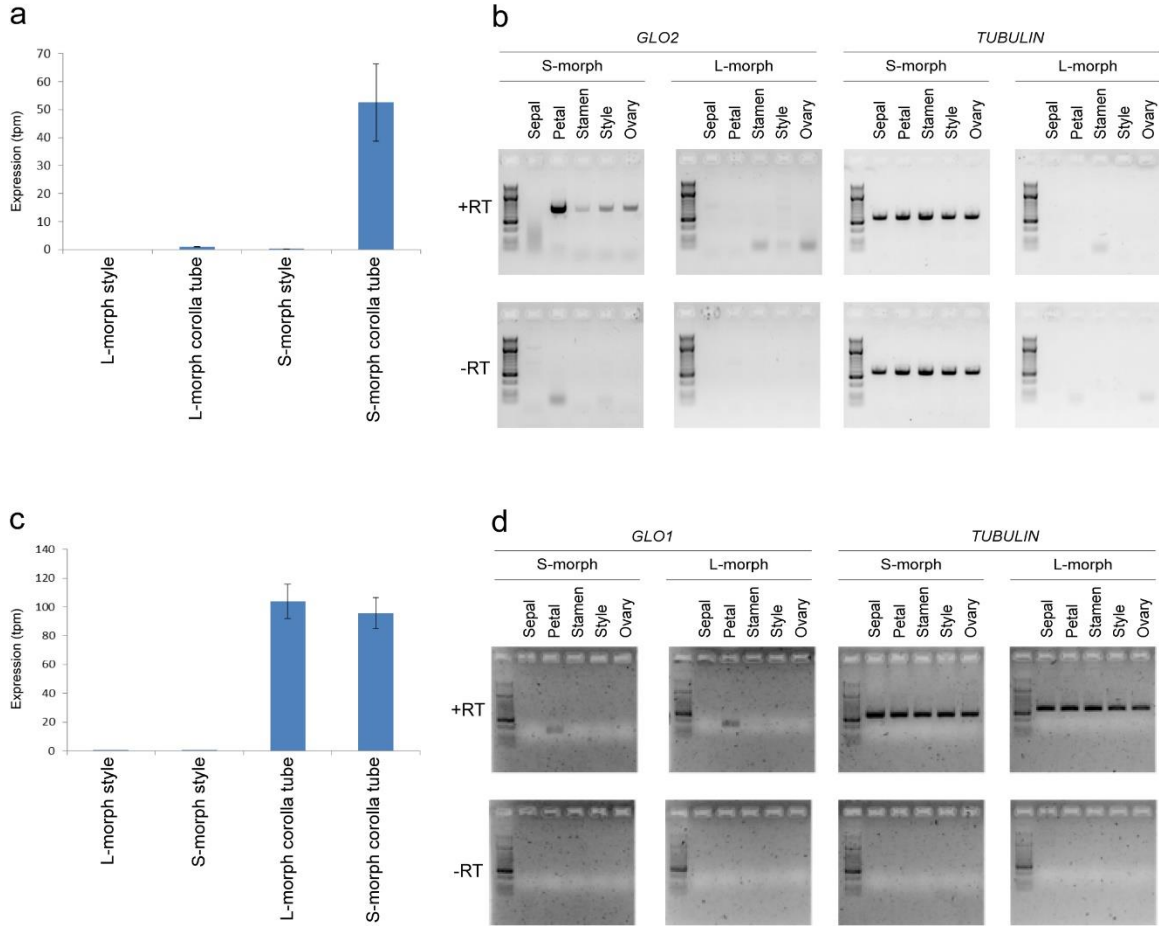

**Figure S3: Expression pattern of *GLO2* and *GLO1* in *Primula veris*.**

- (a) Expression levels of *GLO2* in indicated samples from *P. veris* (n=3) based on RNA-seq.
- (b) Expression of *GLO2* and *TUBULIN* in dissected flower organs.
- (c) Expression levels of *GLO1* in indicated samples from *P. veris* (n=3) based on RNA-seq.
- (d) Expression of *GLO1* and *TUBULIN* in dissected flower organs.

MADS-domain

↓

```

AtPI      MGRGKIEIKRIENANNRVVTFSKRRNGLVKKAKEITVLCDAKVALIIFASNGKMDYCCP
LtPI      MGRGKIEIKRIENSTNRQVTYSKRRGGILKKAKEITVLCDAQVSLVIFSSGTGISEYCS
JaGLO     -----NRQVTYSKRRTGIIKKAKEISVLCDAQVSLVIFASSGKMHEFCSP
ErGLOx   MGRGKIEIKRIENSNRQVTYSKRRNGLVKKAKEISVLCDAKVSLLIFNSSGKMHEYCS
EsGLOx   MGRGKIEIKRIENSNRQVTYSKRRNGLVKKAKEISVLCDAKVSLLIFNSSGKMHEYCS
CpGLO     MGRGKIEIKRIENSNRQVTYSKRRNGLVKKAKEISVLCDAQVSLVIFASSGKMHEYVSP
HwGLO     -----HRQVTYSKRRNGI KKAKEISVLCDAQVSLVIFASSGKMHEYVSP
ErGLOy   MGRGKIEIKRIENSNRQVTYSKRRNGI KKAKEISVLCDAQVSLVIFASSGKMHEYVSP
EsGLOy   MGRGKIEIKRIENSNRQVTYSKRRNGI KKAKEISVLCDAQVSLVIFASSGKMHEYVSP
PfoGLO1  MGRGKVEIKRIENSNI RQVTYSKRRNGI KKAKEIAVLCDAQVSLVIFASSGKMHEYCS
PorGLO1  MGRGKIEIKRIENSNRQVTYSKRRNGI KKAKEIAVLCDAQVSLVIFASSGKMHEYCS
PmaGLO1  MGRGKIEIKRIENSNRQVTYSKRRNGI KKAKEIAVLCDSQVSLVIFATSGKMHEYCS
PdGLO1   MGRGKIEIKRIENSNRQVTYSKRRNGI KKAKEISVLCDAQVSLVIFASSGKMHEYCS
PviGlo   MGRGKIEIKRIENSNRQVTYSKRRNGI KKAKEISVLCDAQVSLVIFASSGKMHEYCS
PfaGlo   MGRGKIEIKRIENSNRQVTYSKRRNGI KKAKEISVLCDAQVSLVIFASSGKMHEYCS
PveGLO1  MGRGKIEIKRIENSNRQVTYSKRRNGI KKAKEISVLCDAQVSLVIFANS GKMHEYCS
PelGlo   MGRGKIEIKRIENSNRQVTYSKRRNGI KKAKEISVLCDAQVSLVIFANS GKMHEYCS
PvuGLO1  MGRGKIEIKRIENSNRQVTYSKRRNGI KKAKEISVLCDAQVSLVIFANS GKMHEYCS
PmaGLO2  MGRGKVEIKRIENPNIRQVTYSNRRNGIMKKAKEISVLCDAQVSLVIFANS GKM DYCS
PfoGLO2  MGRGKVEIKRIENSNI RQVTYSNRRNGI KKAKEISVLCDAQVSLVIFASSGKM HDYCS
PorGLO2  MGRGKVEIKRIENSNI RQVTYSNRRNGI KKAKEISVLCDAQVSLVIFASSGKM HDYCS
PfaGloT  MGRGKVEIKRIENSNI RQVTYSNRRNGILKKAKEISVLCDAQVSLVIFASSGKM HDYCS
PelGloT  MGRGKVEIKRIENSNI RQVTYSNRRNGILKKAKEISILCDAQVSLIIFASSGKM HDYCS
PveGLO2  MGRGKVEIKRIENSNI RQVTYSNRRNGILKKAKEISVLCDAQVSLIIFASSGKM HDYCS
PvuGLO2  MGRGKVEIKRIENSNI RQVTYSNRRNGILKKAKEISVLCDAQVSLIIFSSSKM HDYCS
PviGloT  MGRGKVEIKRIENSNI RQVTYSNRRNGILKKAKEISVLCDAQVSLVIFASSGKM HDYCS
PdGloT   MGRGKVEIKRIENSNI RQVTYSNRRNGILKKAKEISVLCDAQVSLVIFASSGKM HDYCS
PmPI     MGRGKIEIKRIENSNRQVTYSKRRNGI KKAKEITVLCDAKVS LVI FASSGKMVEYCS
CaPI     MGRGKIEIKRIENSNRQVTYSKRRNGILKKAKEITVLCDAKVS LVI FASSGKM HDYISP
AdPI     MGRGKIEIKRIENSNRQVTYSKRRNGILKKAKEITVLCDAQVSLIIFAA SGM HDYISP
ApGLO    MGRGKIEIKRIENSNRQVTYSKRRNGILKKAKEITVLCDAQVSLIIFAA SGM HDYISP
GmPI     MGRGKIEIKRIENSNRQVTYSKRRNGILKKAKEITVLCDAQVSLIIFAA SGM HDYISP
PhvPI    MGRGKIEIKRIENSNRQVTYSKRRNGILKKAKEITVLCDAQVSLIIFAA SGM HDYISP
MhPI     MGRGKIEIKRIENISNRQVTYSKRRNGLIKKAKEISVLCDAQVSVVIFGSSGKMHEYCS
RkPI     MGRGKIEIKRIENTSNRQVTYSKRRNGLIKKAKEISVLCDAHVS VVIFASTGKMHEYCS
TcGLO    MGRGKIEIKRIENSNRQVTYSKRRNGIMKKAKEITVLCDAVSLIIFASSGKMHEYCS
HuGLO    MGRGKIEIKRIENSNRQVTYSKRRNGIMKKAKEITVLCDAVSLIIFASSGKMHEYCS
CpaPI    MGRGKIEIKRIENLSNRQVTYSKRRNGI KKAKEITVLCDAVSLIIFASSGKMHEYCS
HmPI     MGRGKIEIKRIENTSNRQVTYSKRRNGILKKAKEITVLCDAVSLIVSASSGKMHEYCS
PePI     MGRGKIEIKRIENSNRQVTFSKRRSGI KKAKEITVLCDAQVSLVIFASSGRMHEYCS
McGLO    MGRGKIEIKRIENSNRQVTYSKRRNGI KKAKEITVLCDAQVSLVIFASSGKMHEYCS
CpeGLO   MGRGKIEIKRIENSNRQVTYSKRRNGI KKAKEITVLCDAQVSLVVFASSGKMHEYCS
RlGLO    MGRGKIEIKRIENSNRQVTYSKRRNGI KKAKEITVLCDAQVSVVIFASSGKMTEYCS
RcPI     -GRGKIEIKRIENSNRQVTYSKRRNGI KKAKEITVLCDAQVSVVIFASSGKMTEYCS
VvPI     MGRGKIEIKRIENSNRQVTYSKRRNGIMKKAKEITVLCDAHVS LVI FASSGKMHEYCS
CkPI     MGRGKIEIKRIENSNRQVTYSKRRNGIMKKAKEITVLCDAHVS LVI FASSGKMHEYCS
AcPI     MGRGKIEIKRIEHSSNRQVTYSKRRNGILKKAKEISVLCDAKVS LVI FASSGKMHEYCS
CjGLO    MGRGKIEIKRIENSNRQVTYSKRRNGIMKKAKEITVLCDAQVSLVIFASSGKMHEYCS
HbPI     MGRGKIEIKRIENSNRQVTYSKRRNGIMKKAKEITVLCDAKVS LVI FASSGKMHEYCS
JcPI     MGRGKIEIKRIENTSNRQVTYSKRRAGIMKKAKEITVLCDAQVSLVIFASSGKMHEYCS
MaPI     MGRGKIEIKRIENSNRQVTYSKRRNGIMKKAKEITVLCDAQVSLVIFATSGKMHEYCS
MePI     MGRGKIEIKRIENSNRQVTYSKRRNGI KKAKEITVLCDAQVSLVIFASSGKMHEYCS
VpPI     MGRGKIEIKRIENSNRQVTYSKRRNGI KKAKEITVLCDAQVSLVIFASSGKMHEYCS
PedPI    MGRGKIEIKRIENSNRQVTYSKRRNGI KKAKEITVLCDAKVS LVI FASSGKMHEYCS

```

\* \*\*:\*:\* . \*::\*\*\*.\*\*\*:\*\*\*: \*::: . . . : : . \*

K-domain

AtPI SMDLGAMLDQYQKLSGK-KLWDAKHENLSNEIDRIKKENDSLQLELRHLKGEDIQSLN-L  
 LtPI STTLVKILDRYQKSSGK-KLWDAKHEHLSNEVERIKKENDSMQIKLRHLKGEDITSLH-P  
 JaGLO NSSLINILDAYQRQSGI-KLWDAKHENLYNEIERIKKENDNMQVELRHLKGEDIQSLH-H  
 ErGLOx K--LIKILDAYQKQSGN-RLWDAKHENLSNEIERIKKENDNMQIELRHLKGEDITSLH-H  
 EsGLOx NSELIKILDAYQKQSGN-RLWDAKHENLSNEIERIKKENDNMQIELRHLKGEDITSLH-H  
 CpGLO NSSLINILDAYQKQSGT-RLWDAKHENLSNEIERIKKENDNMQNELRHLKGEDINSLH-H  
 HwGLO NSSLINILDAYQKQSGT-RLWDAKHENLSHEIERIKKENDNMQIELRHLKGEDINSLH-H  
 ErGLOy K--LINILDAYQKQSGT-RLWDAKHENLSNEIERIKKENDNMQIELRHLKGEDINSLH-H  
 EsGLOy K--LINILDAYQKQSGT-RLWDAKHENLSNEIERIKKENDNMQIELRHLKGEDINSLH-H  
 PfoGLO1 KSPLINILDAYQKQSGN-RLWDAKHENLSNEIERIKKENDNMQIELRHLKGEDIQSLH-H  
 PorGLO1 KSPLINILDAYQKQSGN-RLWDAKHENLSNEIERIKKENDNMQIELRHLKGEDIQSLH-H  
 PmaGLO1 KTPLINILDAYQKQSGN-RLWDAKHEDLSNEIERIKKENDNMQIELRHLKGEDIQSLH-H  
 PdGLO1 KTPLINILDAYQKQSGN-RLWDAKHENLSNEIERIKKENDNMQIELRHLKGEDIQSLH-H  
 PviGlo KTPLINILDAYQKQSGN-RLWDAKHENLSNEIERIKKENDNMQIELRHLKGEDIQSLH-H  
 PfaGlo KTPLINILDAYQKQSGN-RLWDAKHENLSNEIERIKKENDNMQIELRHLKGEDIQSLH-H  
 PveGLO1 KTPLINILDAYQKQSGN-RLWDAKHENLSNEIERIKKENDNMQIELRHLKGEDVQSLH-H  
 PelGlo KTPLINILDAYQKQSGN-RLWDAKHENLSNEIERIKKENDNMQIELRHLKGEDVQSLH-H  
 PvuGLO1 KTPLINILDAYQKQSGN-RLWDAKHENLSNEIERVKKENDNMQIELRHLKGEDVQSLH-H  
 PmaGLO2 NSSLINILDAYQKQSGT-RLWDAKHENLSNEIGRVKKENDNMEIELRYLKGEDIH-LH-H  
 PfoGLO2 NSSLINILDAYQKQSGT-RLWEAKHENLSNEIERIKKENDNMQIELRYLKGEDIQSLH-H  
 PorGLO2 NSSLINILDAYQKQSGT-RLWEAKHENLSNEIERIKKENDNMQIELRYLKGEDIQALH-H  
 PfaGloT NSSLINILDAYQKQSGI-KLWDAKHENLSNEIERVKKENDNMQIELRYLKGEDIQSLH-H  
 PelGloT NSSLINILDAYQKQSGI-RLWDARHENLSNEIERVKKENDNMQIELRYLKGEDIQSLH-H  
 PveGLO2 NSSLINILDAYQKQSGI-RLWDARHENLSNEIERVKKENDNMQIELRYLKGEDIQSLH-H  
 PvuGLO2 NSSLINILDAYQKQSGI-RLWDARHENLSNEIERVKKENDNMQIELRYLKGEDIQSLH-H  
 PviGloT NSSLINILDAYQKQSGI-RLWDARHENLSNEIERVKKENDNMQIELRYLKGEDIQSLH-H  
 PdGloT NSSLINILDAYQKQSGI-RLWDARHENLSNEIERVKKENDNMQIELRYLKGEDIQSLH-H  
 PmPI SVTVDILDKYHGQAGK-KLWDAKHENLSNEVDRVKKDNDSMQVELRHLKGEDITSLT-H  
 CaPI STTLIDILERYHKTSGK-RLWDAKHENLSNEIERLKKENDGMQVELRHLKGEDINSLH-Y  
 AdPI STTLIDILERYHKTSGK-RLWDAKHENLSNEIERLKKENDGMQIELRHLKGEDINSLN-Y  
 ApGLO STTLIDVLERYHKTSGK-RLWDAKHENLSNEIERLKKENDSMQIELRHLKGEDINSLN-Y  
 GmPI STTLIDILERYHKTSGK-RIWDAKHENLNGEIERLKKENDSMQIELRHLKGEDINSLN-Y  
 PhvPI STTLIDILERYHKTSGK-RLWDAKHENLSNEIERLKKENDSMQIELRHLKGEDINSLN-Y  
 MhPI STKLVDILDKYHRHSGN-KLWDAKHENLSNEIDRIKKENDSMQIELRHLRGEDITSLR-H  
 RkPI STTLVDILERYHKSAGK-KLWDAKHENLSSEIDRIKKENDSMQIELRHLRGEDITSLHGH  
 TcGLO STNLIDILDQYHKTSGK-RLWDAKHENLSNEIDRIKKENDSMHIELRHLKGEDITSLQ-Y  
 HuGLO STNLIDILDQYHKTSGK-RLWDAKHENLSNEIDRIKKENDSMHIELRHLKGEDITSLQ-Y  
 CpaPI STSLTNMLDEYHK-AGKPRLWDAKHENLNNEIERVKKENDNMQIELRHLRGEDITSLN-H  
 HmPI KTTLIDILDKYHTQSGK-RLWDAKHENLSNEIDRIKKENDNMQIELRHLKGEDVTSLN-H  
 PePI STTVVDLLDKYQKQSGK-RLWDAKHENLSNEIDRIKKENDSMQIELRHLKGGDISSLP-H  
 McGLO STPLIDILDKYHKQSGK-RLWDAKHENLSNEMDRVKKENDNMQIELRHLRGEDITSLN-Y  
 CpeGLO STPLIDILDKYHKQSGK-RLWDAKHENLSNEMDRVKKENDNMQIELRRLRGEDITSLN-Y  
 RIGLO STTLIDLLDRYHKQSGK-RLWDAKHENLSNEIDRIKKENDAMQIELRHLKGEDIASLN-H  
 RcPI STTLIDLLDRYHKQSGK-RLWDAKHENLSNEIDRIKKENDAMQIELRHLKGEDIASLN-H  
 VvPI STTLIDILDRYHKQSGK-RLWDAKHENLSNELDRIKKENDSMQIELRHLKGEDISSLH-H  
 CkPI STKLVDILDRYHTQSGK-RLWDAKHENLSNEIDRIKKENDSMQIELRHLKGEDITSLH-Y  
 AcPI STTLVDILDKYHKQSGK-RLWDAKHENLSNELDRIKKENDSMQIELRHLKGEDITSLH-H  
 CjGLO STTLVDILDKYHKQSGE-RLWDAKHENLSNELDRIKKENDSMQIELRHLKGEDITSLH-H  
 HbPI STTLIDMLDMYHKQSGK-RLWDAKHENLSNEIDRIKKENDNMQIELRHLLEGQDISSLQ-P  
 JcPI STSLIEILDKYHKHAGK-RIWDAKHENLSNEIDRIKKENDSMQIELRHMKGEDIASLN-H  
 MaPI STTLVDMLDKYHKQSGK-RLWDAKHENLSNEIDRVKKENDNMQIELRHMKGDDITSLH-H  
 MePI STTLIDILDRYHKQSGK-RLWDAKHENLSNEIDRIKKENDNMQIELRHLKGEDITSLH-H  
 VpPI STSLVELLDKYHKQSGK-RLWDAKHENLSNEIDRVKKENDSMQIELSHLKGKIDITSLH-H  
 PedPI STTLVDLLDKYHKQSGK-RLWDAKHENLSNEIDRIKKENDSMQIELRHLKGEDITSLH-H  
 . : \*\*: \* : :\* .:\*.\*\*.\*\*: \* : \*:.\*\*.\*: : :\* : \*.\*: \*

K-domain (cont'd)

AtPI KNLMAVEHAIEHGLDKVRDHQMEILISKRRN----EKMMAEERQLTFQL----QQQEMA  
 LtPI RELIPIEEALQNLGACVRSKQMEYKMLKKN----ERTLEENKRLSYIL----HQQQLA  
 JaGLO KELMAIEEALENGLTCVREKQMEIFRMAKKAFAEKQRALEDENKQLSFQIAGTTHHQVMD  
 ErGLOx KELMSIEDALENGLTCVDRQMEIYKLAKKNFADKEMILENENKRLNYQL----HHQMMD  
 EsGLOx KELMSIEDALENGLTCVDRQMEIYKLAKKNFADKEMILENENKHLNYQL----HHQMMD  
 CpGLO KELMSIEDALENGLTCIRERQMEIYRMAKKNFADKERLLEDENKRLTYQM-----HQVMD  
 HwGLO KELMSIEDALENGLTCIRERQMEIYRTAKKNFADKERILEDENKRLSYQM----HHQVME  
 ErGLOy KELMSMEDALENGLTCIRERQMEIYRMAKKNFADKERILEGENKRLSYQM----HHQVMD  
 EsGLOy KELMSMEDALENGLTCIRERQMEIYRMAKKNFADKERILEDENKRLSYQM----HHQVMD  
 PfoGLO1 KELMSLEGALENGLTCVDRQMEIYRMAKENFAYKERIMEDENRSLSYQM----HHQVMD  
 PorGLO1 KELMSLEGALENGLTCVDRQMEIYRMAKENFADKERILEDENRSLSYQM----HHQVMD  
 PmaGLO1 KELMSLEDALENGLTCVRQREMEIYRMAKDNFTDKERILEDENRSLTYQM----HHLVMD  
 PdGLO1 KELISIESALENGLACVRQREMEIYRMARDNFADKERILEDENRSLTYQM----HHLVMD  
 PviGlo KELISIESALENGLACVRQREMEIYRMARDNFADKERILEDENRSLTYQM----HHLVMD  
 PfaGlo KELISIESALENGLACVRQREMEIYRMARDNFADKERILEDENRSLTYQM----HHLVMD  
 PveGLO1 KELMSIESALENGLACVRQREMEIYRMARENFADKERVLEDENRSLTYQM----HHLVMD  
 PelGlo KELMSIESALENGLACVRQREMEIYRMARENFADKERVLEDENRSLTYQM----HHLVMD  
 PvuGLO1 KELMSIESALENGLACVRQREMEIYRMARENFADKERVLEDENRSLTYQM----HHLVMD  
 PmaGLO2 KELMSIEDALENGLIRVRDRQMEIYRMAKENFAEKERLLEDENKRLSDKF-----QQVMD  
 PfoGLO2 KELMSIENALENGVTRVRQRQMEIYMMAKKNFAEKERILEDENNRLNCKI-----QEAMD  
 PorGLO2 KELMSMENALENGVTRVRQRQMEIYMMAKKNFAEKERILEDENNRLNCKI-----QEAMD  
 PfaGloT KELMSIENALENGLNRVRERQMEIYRMAKDNFADKGRRLDDENKRLSYKF-----QQVMD  
 PelGloT KELMSIEVALENGLTRVRERQMEIYRMAKDNFADKERLLEDENKRLGYKF-----QQVMD  
 PveGLO2 KELMSIEDALENGLTRVRERQMEIYRMAKDNFADKERLLEDENKRLGYKF-----QQVMD  
 PvuGLO2 KELMSIEDALENGLTRVRERQMEIYRMAKDNFADKERLLEDENKRLGYKF-----QQVMD  
 PviGloT KELMSIEDALENGLTRVRERQMEIYMAKDNFADKERLLEDENKRLSYKF-----QQVMD  
 PdGloT KELMSIEDALENGLTCVRERQMEIYRMAKDNFADKERLLEDENKRLSYKF-----QQVMD  
 PmPI KELMALEDALENGLASIRDKSKFVDILREN----ERALEEEHKRLTYEL----HKQEMK  
 CaPI KELMSLEDALENGLLTIREKQMEVYRMIRRN----DKILEEENRELNFIIL----QQRMA  
 AdPI KELMGLLEEALENGLQSVREKQMEVYRMFRRN----DKILEEENRELNFIIL----QQRVAV  
 ApGLO KELMSLEDALENGLLSVREKQMEVYRMFRRN----DKILEEENRELNFIW----QQRMA  
 GmPI KELMALEDALLETGLVSVREKQMDVYRMFRRN----DKILEEENRELTFLW----QQRLA  
 PhvPI KELMALEDALLETGLVSVREKQMDVYRMFRRN----DKILEEENRELNFLW----QQRLA  
 MhPI KELMVLEEALDNGLASIRDKEMEYKIMKKN----EKLMEEDNEHLKYML----HQQGID  
 RkPI KELMALEEALLETGLASIRDREMEYFKAMKKN----ERMLEEDNRRLQCML----HQQGID  
 TcGLO KELMAIEDALENGLACVRAKQMDVLDVTRKN----TKMLEEDNKQLNFIV----NQQHIA  
 HuGLO KELMAIEDALENGLACVRAKQMDVLDVTRKN----TKMLEEDNKQLNFIV----NQQHIA  
 CpaPI RDLMALEETLETGLASVRNKQMEVLMKMMRRN----EKILEEENRRLSFAL----QQQEIA  
 HmPI KELMALELALENGLASIRDKDEVFETIKKNV--KIQALEDNKRLIYEL----HQQEMN  
 PePI KELMAIEEVLDTGLAAVRKKQMEFHSMLEQN----EKILDEEFKHLQFVL--TQQQQEMA  
 McGLO KELMALEEALENGLTGVRKQSEFIKMMRTN----ERMMEENKRLNYEL----YQKEMV  
 CpeGLO KELMALEEALENGLTGVRKQSELMKMMRTN----ERMMEENKRLNYEL----YQKEMV  
 RlGLO KELMAIEEALENGLASIRQKQMEYFKNMKKN----ERLLEENKRLSYVL----QQTEME  
 RcPI KELMAIEEALENGLASIREKQMEYFKNMKKN----ERLLEENKRLSFVL----QQTEME  
 VvPI KELMAIEDALEIGLASVRNKQMEFYKMKKN----QRILEEENKHLNYIV----HHQGMP  
 CkPI KELMAIEEALENGLTSNSEKQREIIRMMKKN----EKMLEEYKHLTYQL----QKQELV  
 AcPI KELMALEEALENGLSGIREKQMEVFKMMKKN----EKMLLEDENKHLNFML----HQQGMT  
 CjGLO KELMAIEEALENGLGSVREKQMEYIDMMEKN----KKTLEENKHLNFML----HQQEMN  
 HbPI NELIGIEHALENGLACVRERQMEFYKMKKN----EMNLEENKHLRFIL----QQQEMA  
 JcPI KELMHIEEALENGLASIRDKQMEYKMMKKN----EKILEEENKRLSFIL----QQQEMA  
 MaPI KELMGLLEEALENGLAGVRDKQMEYYKTMKKN----EKMLLEDENKRLSFIL----QQQEMA  
 MePI QELMVIEEALDNGLASVRDKMMEYYNMKKTN----DEILEDMMNKRLRFFW----QQQEMA  
 VpPI KELMAIEEALLETGLTGVRNKQMEYHRMMEKN----GKMLEDETKRLSFIL----QQQELA  
 PedPI KELLALEKALENGLVGVREKQMDYRMEKKN----NKILEDEGKRLSFIL----QQQEMA

..\*: :\* ::: \* : . . : \*

PI-motif

|         |                                                          |
|---------|----------------------------------------------------------|
|         | ▼                                                        |
| AtPI    | IA-SNARGM-----MMRDHDG-Q--FGY--RVQPIQPNLQEKIMSLVID        |
| LtPI    | MD-GNAREMDHGYNQ---REREYHQ-QLP-FTF---RLQPIQPNLHQNQ-----   |
| JaGLO   | ME---GGDMENEY-----NYQP-QMP-FSF---RVQPIQPNLHGRF-----      |
| ErGLOx  | ME---GGEMENEY-----HYQT-QVPNFSF---RVQPIQPNLHGQV-----      |
| EsGLOx  | ME---GGEMENEY-----HYQPPQMPNFSF---RVQPIQPNLHGQV-----      |
| CpGLO   | ME---GGEMENEY-----QYQP-QMP-FSF---RVQPIQPNLHERF-----      |
| HwGLO   | ME---SGEMENDY-----NYQP-QMP-FSF---RVQPIQPNLHERF-----      |
| ErGLOy  | ME---GREMENDY-----NYQP-QMP-FPF---RVQPIQPNLHERF-----      |
| EsGLOy  | ME---GREMENDY-----NYQP-QMP-FPF---RVQPIQPNLHERF-----      |
| PfoGLO1 | IE---SGEMENDY-----QYQP-QMP-FSF---RVQPIQPNLHDRF-----      |
| PorGLO1 | IE---GGEMENDY-----QYQP-QMP-FSF---RVQPIQPNLHERF-----      |
| PmaGLO1 | IE---GEEMENGY-----QYQP-QMP-FSF---RVQPIQPNLQERI-----      |
| PdGLO1  | IE---GGEMENGY-----NYQS-QMP-FSF---RVQPIQPNLQERI-----      |
| PviGlo  | IE---GGEMENGY-----NYQS-QMP-FSF---RVQPIQPNLQERI-----      |
| PfaGlo  | IE---GGEMENGY-----NYQS-QMP-FSF---RVQPIQPNLQERI-----      |
| PveGLO1 | IE---GGEMENGY-----NYQS-QMP-FSF---RVQPIQPNLQERI-----      |
| PelGlo  | IE---GGEMENGY-----NYQS-QMP-FSF---RVQPIQPNLQERI-----      |
| PvuGLO1 | IE---GGEMENGY-----NYQS-QMP-FSF---RVQPIQPNLQERI-----      |
| PmaGLO2 | M-----QMP-CSF---HAKPIQPNLNDRV-----                       |
| PfoGLO2 | M-----QMP-CSY---RVQPIQPNLHDRF-----                       |
| PorGLO2 | M-----QMP-CSY---RVQPIQPNLHDRF-----                       |
| PfaGloT | M-----QMP-CSY---RVQPIQPNLHDRF-----                       |
| PelGloT | M-----QMP-CSY---RVQPLQPNLHDQF-----                       |
| PveGLO2 | M-----QMP-CSY---RVQPLQPNLHDQF-----                       |
| PvuGLO2 | M-----QMP-CSY---RVQPLQPNLHDQF-----                       |
| PviGloT | M-----QMP-CSY---RVQPIQPNLHDRF-----                       |
| PdGloT  | M-----QMP-CSY---RVQPIQPNLHDRF-----                       |
| PmPI    | IE-ENVRELENGY-HQ---RLGNYNN-QIP-FAF---RVQPIQPNLQERM-----  |
| CaPI    | VE---GAREVENGFNQ---SGRDFNS-QMP-FSY---RVQPMQPNLHERI-----  |
| AdPI    | ME---GAREMDDGFDQ---GVRDFNS-QMP-FAF---RVQPIQPNLQERM-----  |
| ApGLO   | VE---GAREVDNGFDQ---SVRDFNS-QMP-FAF---RVQPMQPNLQERI-----  |
| GmPI    | VE---GAREVDNGFDQ---SVRDYNS-HMP-FAF---RVQPMQPNLQERI-----  |
| PhvPI   | VE---GAREVENGFDE---SVRDYNS-HMP-FAF---RVQPMQPNLQERI-----  |
| MhPI    | MD---GGEMENGYHHHH---QVREYQP-QMP-FAF---HNLQIQPNLQERF----- |
| RkPI    | ME---GGDMENGYQHQQHVREYQP-QMP-FAFHNLQIQPIQPNLQERF-----    |
| TcGLO   | YE-NAREQMDNGY-Q---RARDYNS-QIP-FAF---RVQPMQPNLQERM-----   |
| HuGLO   | YE-NAREQMDNGY-Q---RARDFSS-QMP-FAF---RVQPMQPNLQERM-----   |
| CpaPI   | IE-NSAREMENGY-QQ---RMREYNA-HMP-FAF---RVQPIQPNLQDRI-----  |
| HmPI    | ME-CNVREMENGY-Q---RVGDYQSHQMP-FAF---RVQPIQPNLQERM-----   |
| PePI    | ME-ENAMEMENAY-HQQ---RVRDYNS-QVP-FAF---RVQPIQPNLQERM----- |
| McGLO   | AMGESVREMDNGYNQ---RMRDFNS-QMP-FAF---RVQPIQPNLQERI-----   |
| CpeGLO  | AM---GDGVDNGY-NQ---RMRDFNS-QMP-FAF---RVQPIQPNLQERNN----- |
| RIgLO   | EN---VREMECGLQQQ---RMREYNS-QMP-FSF---RVQPIQPNLQERM-----  |
| RcPI    | EN---AREMESGFQQQ---RMREYNSHQMP-FSF---RVQPIQPNLQERM-----  |
| VvPI    | MEAGNVREVESGY-HQR---AVRDYNP-QMP-FAF---RVQPIQPNLQERI----- |
| CkPI    | ME-GNLREMENGf-HQ---RVRDFQP-QMP-FSF---RVQPIQPNLQDRM-----  |
| AcPI    | ME---SREMENGYHQ---RVRDYQH-QMP-FAF---HVQPIQPNLQDRI-----   |
| CjGLO   | ME---SSREMENGYHQ---RVRDFQS-QMP-FAF---RVQPIQPNLQERI-----  |
| HbPI    | ME-ENMREMENPYHQQ---RVREYNS-QMP-FAF---RVQPIQPNLQERM-----  |
| JcPI    | IE-ENVRELENPYHQH---RVRDYSS-QMP-FAF---RVQPIQPNLQERM-----  |
| MaPI    | ME-ENVREMENPYHQQ---RVRDYNS-QMP-FAF---RVQPIQPNLQERM-----  |
| MePI    | ME-ENVREMENPYHQQ---RVRDYNS-QMP-FAF---RVQPIQPNLQERM-----  |
| VpPI    | LE-ENARDMENAYHQQ---RAREYNS-QMP-FAF---RVQPIQPNLQERI-----  |
| PedPI   | IE-EDAREMENAY-HQQ---KLREYSS-QIP-FAF---RVQPIQPNLQERM----- |

: : . :\*\*\*\*: .



#### Figure S4: Multiple-sequence alignment of GLO-related proteins

Protein sequence alignment was generated with MUSCLE 3.8. Amino acids are color-coded according to their physicochemical properties. Symbols in the bottom-most line on each page indicate the conservation at each position, with '\*' indicating perfect conservation, ':' showing positions with biochemically similar amino acids (score greater than .5 on the PAM 250 matrix), and '.' indicating conservation between amino acids with weakly similar properties (score less than or equal to .5 on the PAM 250 matrix). The protein domains are annotated according to (1).

*Primula* GLO1 sequences are highlighted in green, GLO2 sequences in yellow. GLO sequences from the most closely related outgroup species *Embelia ribes* and *E. sessiflora* are highlighted in blue (see also Figure 4). Red arrow and black arrowhead indicate amino-acid exchanges of otherwise highly conserved amino acids that are specifically found in *Primula* GLO2 orthologues. The sequences used were chosen from the top 200 hits of a BLAST search with PvuGLO1 to represent a broad sample of angiosperms and are from the following species.

PveGLO1: *Primula veris* (ANU06251.1); PveGLO2: *Primula veris* (ANU06256.1); PvuGLO1: *Primula vulgaris* (AMN15096.1); PvuGLO2: *Primula vulgaris* (ANU06249.1); PfoGLO1: *Primula forbesii* (\*); PfoGLO2: *Primula forbesii* (\*); PdGLO1: *Primula denticulata* (ANU06253.1); PdGLO2: *Primula denticulata* (ANU06257.1); PviGLO1: *Primula vialii* (ANU06258.1); PviGLO2: *Primula vialii* (ANU06254.1); PelGLO1: *Primula elatior* (ANU06259.1); PelGLO2: *Primula elatior* (ANU06252.1); PfaGLO1: *Primula farinosa* (ANU06260.1); PfaGLO2: *Primula farinosa* (ANU06255.1); PorGLO1: *Primula oreodoxa* (\*); PorGLO2: *Primula oreodoxa* (\*); PmaGLO1: *Primula maximowiczii* (\*); PmaGLO2: *Primula maximowiczii* (\*); ErGLOx: *Embelia ribes* (\*); ErGLOy: *Embelia ribes* (\*); EsGLOx: *Embelia sessiflora* (\*); EsGLOy: *Embelia sessiflora* (\*); Vv: *Vitis vinifera* (NP\_001267875.1); Cp: *Cyclamen persicum* (BAK09618.2); Hw: *Hymenandra wallichii* (ACY91928.1); Ja: *Jacquinia aurantiaca* (ACY91926.1); Ac: *Actinidia chinensis* (ADU15475.1); Cj: *Camellia japonica* (ADX86812.1); Mc: *Momordica charantia* (XP\_022154226.1); Ma: *Mercurialis annua* (ALK01328.2); Cpe: *Cucurbita pepo* (XP\_023536339.1); Ped: *Passiflora edulis* (AER30449.1); Hm: *Hydrangea macrophylla* (BAG68951.1); Vp: *Viola philippica* (APQ46145.1); Rl: *Rhizanthus lowii* (AHH28258.1); Ck: *Cornus kousa* (AGA61757.1); Me: *Manihot esculenta* (XP\_021605746.1); Rk: *Rhododendron kaempferi* (BBA27231.1); Hb: *Hevea brasiliensis* (XP\_021636651.1); Ca: *Cicer arietinum* (XP\_004498359.2); Rc: *Rafflesia cantleyi* (AHH28269.1); Jc: *Jatropha curcas* (XP\_012078322.1); Mh: *Monotropa hypopitys* (AQM52304.1); Ad: *Arachis duranensis* (XP\_015935244.1); Tc: *Theobroma cacao* (XP\_007019220.1); Ap: *Abrus precatorius* (P\_027332702.1); Hu: *Herrania umbratica* (XP\_021284325.1); Cpa: *Carica papaya* (XP\_021902590.1); Pe: *Populus euphratica* (XP\_011027462.1); Pm: *Prunus mume* (XP\_008219575.1); Gm: *Glycine max* (NP\_001235385.1); Lt: *Liriodendron tulipifera* (AIE44761.1); Phv: *Phaseolus vulgaris* (XP\_007161433.1).

\*: The coding sequences of these proteins are given in Supplemental File 1.

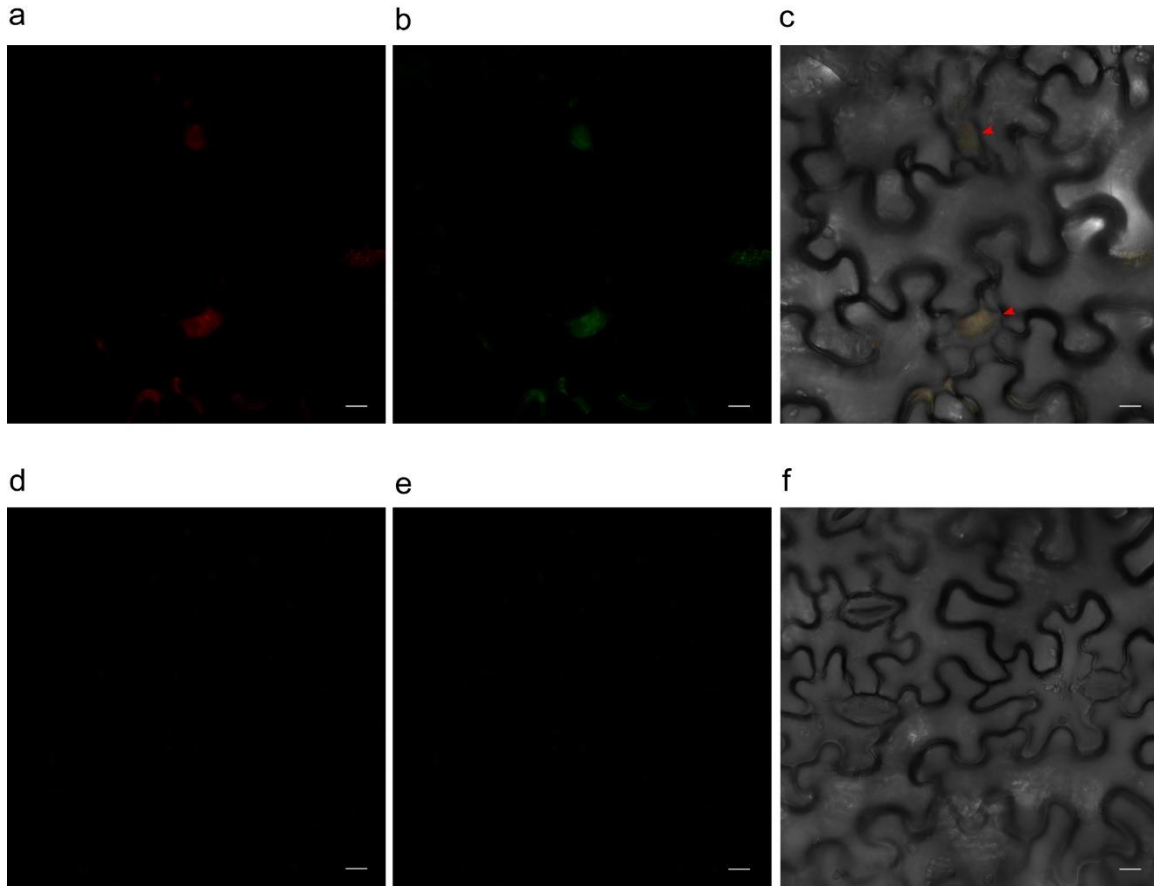

**Figure S5: Subcellular localization of GLO1 and GLO2 proteins in *Nicotiana benthamiana*.**  
(a-c) *N. benthamiana* epidermal cells infiltrated with the construct expressing GLO1-mCherry and GLO2-mGFP fusion proteins. Red arrows indicate the localization of GLO1 and GLO2 proteins.  
(d-f) *N. benthamiana* epidermal cells without infiltration as negative control.  
(a,d) RFP channel; (b,e) GFP channel; (c,f) overlay with brightfield image.  
Scale bar is 5  $\mu$ m.

**Table S1: Genetic mapping of *GLO2* in *Primula veris* and *Primula forbesii***

In *Primula veris*

| Morph | Number of morphs tested | <i>GLO2</i> |         |
|-------|-------------------------|-------------|---------|
|       |                         | Presence    | Absence |
| S     | 68                      | 68          | 0       |
| L     | 72                      | 0           | 72      |

In *Primula forbesii*

| Morph | Number of morphs tested | <i>GLO2</i> |         |
|-------|-------------------------|-------------|---------|
|       |                         | Presence    | Absence |
| S     | 16                      | 16          | 0       |
| L     | 16                      | 0           | 16      |

Genetic mapping of *GLO2* in both populations of *P. veris* and *P. forbesii* was done using a PCR-based method as described in (Huu et al., 2016). The linkage of *GLO2* was detected based on the presence or absence in different morphs. The primers used that bind specifically to the intron region of *GLO2* either in *P. veris* or *P. forbesii* are listed in the Supplemental Table 3.

**Table S2: Putative orthologues of *Primula GLO1* and *CYP734A51***

| <i>Primula</i>   | <i>Solanum lycopersicum</i>          | <i>Mimulus guttatus</i>       | <i>Lactuca sativa</i>                      | <i>Daucus carota</i>                       |
|------------------|--------------------------------------|-------------------------------|--------------------------------------------|--------------------------------------------|
| <i>GLO1</i>      | Solyc06g059970.2.1;<br>chromosome 6  | Migut.A00326.1;<br>scaffold 1 | Lsat_1_v5_gn_1_7541.2;<br>linkage group 1  | DCAR_014370;<br>chromosome 4<br>(22.42 Mb) |
|                  | Solyc08g067230.2.1;<br>chromosome 8  |                               |                                            |                                            |
| <i>CYP734A51</i> | Solyc03g120060.2.1;<br>chromosome 3  | Migut.I00807.1;<br>scaffold 9 | Lsat_1_v5_gn_8_57861.1;<br>linkage group 8 | DCAR_014861;<br>chromosome 4<br>(17.72 Mb) |
|                  | Solyc12g006860.1.1;<br>chromosome 12 | Migut.D01051.1;<br>scaffold 4 | Lsat_1_v5_gn_5_97860.1;<br>linkage group 5 | DCAR_009214;<br>chromosome 3               |

Putative orthologues were recovered by BlastN search using *P. veris GLO1* and *CYP734A1* against whole-genome assemblies of the indicated species in Phytozome. The tomato genome contains two duplicates of *GLO*. All four queried genomes contain two very closely related sequences to *CYP734A51*, which are both given, as it is not possible to determine orthology in the absence of a higher-quality *Primula* reference genome. Reverse BlastN searches using the putative *GLO* orthologues from the other species against all *Primula* sequences in NCBI GenBank unambiguously identified *GLO1* or *GLO2* as top matches over all other *Primula* MADS-box genes. Putative *CYP734A51* orthologues from other species also identified *CYP734A51* as best match from all available *Primula* sequences in NCBI GenBank; given the incomplete coverage, these were also searched against a *P. veris* transcriptome assembly (2), where they identified one of several transcript isoforms representing *CYP734A51* as top hit.

**Table S3: Pairwise synonymous-site divergence of *CYP734A* and *GLO* genes**

|                 |                 |                |  |                |
|-----------------|-----------------|----------------|--|----------------|
|                 | <i>EriCYP51</i> |                |  | <i>MinCYPb</i> |
| <i>EseCYP51</i> | 0.053           |                |  |                |
| <i>MjaCYPb</i>  |                 |                |  | 0.137          |
|                 | <i>EriGLOx</i>  | <i>EriGLOy</i> |  | <i>MinGLO1</i> |
| <i>EseGLOx</i>  | 0.006           |                |  |                |
| <i>EseGLOy</i>  |                 | 0.020          |  |                |
| <i>MjaGLO1</i>  |                 |                |  | 0.065          |

Ks values of pairwise synonymous-site divergence for the indicated comparisons are shown. Mauve shading indicates comparisons between the two *Embelia* species, and apricot shading shows comparisons between the two *Maesa* species.

**Table S4: Oligonucleotides used in this study**

| Marker/Name    | Primer 1                                                      | Primer 2                                                   | Used for                                                              |
|----------------|---------------------------------------------------------------|------------------------------------------------------------|-----------------------------------------------------------------------|
| PvGlo2         | CACAGGAATTTCAAACATCCA                                         | TGCTAGCTCCGGTAAGATGC                                       | Mapping <i>GLO2</i> in <i>Primula veris</i>                           |
| PfGlo2         | CAAGAAGCGATGGATATG                                            | GCGATCATGTAAATTTGGC                                        | Mapping <i>GLO2</i> in <i>Primula forbesii</i>                        |
| PfGLO2-VIGS    | CGGGAATTC AATTCCTCGTTAATTAATATC                               | CGGGGATCCCCTTCTTGAATTTTGAATT<br>AAG                        | Design VIGS construct for <i>GLO2</i> in <i>Primula forbesii</i>      |
| PfGLO1-VIGS    | CGGGAATTCATCGCAGTTTTGTGTGATGC                                 | CGGGGATCCAATTTGGCTGAATTGGTTGC                              | Design VIGS construct for <i>GLO1</i> in <i>Primula forbesii</i>      |
| Tq_TUB         | TTCCACCCTGAACAACCTCATT                                        | AAGCACAGGTCCACAATCTC                                       | As control for qRT-PCR <i>GLO1/GLO2</i> in <i>Primula forbesii</i>    |
| Tq_TUB_probe   | FAM-ACAACTTCGCCAGAGGCCATTATACC-<br>BHQ1                       |                                                            | As control for qRT-PCR <i>GLO1/GLO2</i> in <i>Primula forbesii</i>    |
| Tq_GLO2        | CCACAAGGAGCTCATGTCTAT                                         | GGCGTTGTTCTCATCTTCTA                                       | qRT-PCR <i>GLO2</i> in <i>Primula forbesii</i>                        |
| Tq_GLO2_probe  | FAM-TGTCCGCCAGAGACAAATGGAGAT-<br>BHQ1                         |                                                            | qRT-PCR <i>GLO2</i> in <i>Primula forbesii</i>                        |
| Tq_GLO1        | AGGCTGGTATTGATAATCA                                           | GGTGCCCTCGAAAATGGACTC                                      | qRT-PCR <i>GLO1</i> in <i>Primula forbesii</i>                        |
| Tq_GLO1_probe  | FAM-<br>GGTGGTGCATTTGATAACTAAGGCTTC-<br>BHQ1                  |                                                            | qRT-PCR <i>GLO1</i> in <i>Primula forbesii</i>                        |
| PvGLO-T-qPCR   | CTGCAGTCCAATTCCTC                                             | AATCCCAGATTGCTTCTG                                         | RT-PCR <i>GLO2</i> in <i>Primula veris</i>                            |
| PvGLO-P-qPCR   | TTGCAGCCCTAAAACCTCC                                           | CAGATTGCTTCTGGTATG                                         | RT-PCR <i>GLO1</i> in <i>Primula veris</i>                            |
| PfGLO1-mCherry | GGGGACAAGTTTGTACAAAAAAGCAGGCTT<br>AATGGGAAGAGGAAAGGTAGAGATAAA | GGGGACAAGTTTGTATAGAAAAGTTGGGTG<br>AAAGCGATCATGTAAATTTGGCTG | Fuse protein <i>GLO1</i> with mCherry for subcellular localization    |
| PfGLO2-GFP     | GGGGACAAGTTTGTATAATAAAGTTGTAATG<br>GGAAGAGGAAAGGTAGAGATAAA    | GGGGACCACTTTGTACAAGAAAGCTGGGTT<br>AAAGCGATCATGTAAATTTGGCTG | Fuse protein <i>GLO2</i> with GFP for subcellular localization        |
| PvGLO1-SNP     | TGCACATATTGTCATTAGCATTG                                       | GTATTAGGAGAAGTGTAGCCAGACA                                  | Linkage between <i>GLO1</i> and <i>CYP734A51</i> <i>Primula veris</i> |
| PvCYP1-SNP     | CCACCTTTATATCCAAAAAACCGCA                                     | AAATTTGGCTGAATCGGTTG                                       | Linkage between <i>GLO1</i> and <i>CYP734A51</i> <i>Primula veris</i> |
| Mi_CYPb_1      | GGCTCAAGAAGAAAGCGAGTT                                         | TGCATTAGCTTGATCGGAAA                                       | Amplification of <i>CYPb</i> in <i>Maesa japonica</i>                 |
| Mi_CYPb_2      | TTCCCTACATGGTGCAATGA                                          | GGCAAAAGGCAATGTTGATT                                       | Amplification of <i>CYPb</i> in <i>Maesa japonica</i>                 |
| Mi_CYPb_3      | TTCTGTCTGCTTCGGCAACA                                          | TAATGTGGGGCCAAGCGAAA                                       | Amplification of <i>CYPb</i> in <i>Maesa japonica</i>                 |
| Mi_CYPb_4      | GACCACGTGACATACCCTCC                                          | TTGATTGCTTAGGGTTGGTACA                                     | Amplification of <i>CYPb</i> in <i>Maesa japonica</i>                 |
| Mi_GLO1_1      | TTTAAGTAACGGTGGGGGCT                                          | GTATGGGAGGCACACTTCCT                                       | Amplification of <i>GLO1</i> in <i>Maesa japonica</i>                 |

|           |                         |                          |                                                       |
|-----------|-------------------------|--------------------------|-------------------------------------------------------|
| Mi_GLO1_2 | AAGGAGAGATGGGGAGAGGAAAG | CCGCCTAGTCACTCCAATGT     | Amplification of <i>GLO1</i> in <i>Maesa japonica</i> |
| Mi_GLO1_3 | CATTGGAGTGACTAGGCGGG    | CTATAGCACGGGTGCGAACA     | Amplification of <i>GLO1</i> in <i>Maesa japonica</i> |
| Mi_GLO1_4 | GCACGCGTGTTCAGACATTTA   | TCAACCGAGCACAAAGTCCA     | Amplification of <i>GLO1</i> in <i>Maesa japonica</i> |
| Mi_GLO1_5 | CTAAGGAAGTGTGCCTCCCA    | AGGGATGGTTCCTGCTACAC     | Amplification of <i>GLO1</i> in <i>Maesa japonica</i> |
| Mi_GLO1_6 | GTGTAGCAGGAACCATCCCT    | GAGATATAAAATAAGGGGGAGTCG | Amplification of <i>GLO1</i> in <i>Maesa japonica</i> |

**Dataset S1 (separate file): Coding and genomic sequences of genes assembled from whole-genome shotgun sequencing or RNA-seq data and used for phylogenetic reconstruction in Figure 4d,e, along with IGV screenshots of back-mapping reads to gene models.**

### **SI References**

1. S. de Bruijn, *et al.*, PISTILLATA paralogs in *Tarenaya hassleriana* have diverged in interaction specificity. *BMC Plant Biology* **18**, 368 (2018).
2. C. N. Huu, *et al.*, Presence versus absence of CYP734A50 underlies the style-length dimorphism in primroses. *Elife* **5** (2016).
